# Golden pompano genome resource enables discovery of valuable gene determining growth traits

Honglin Luo<sup>1\*</sup>, Yongde Zhang<sup>1\*</sup>, Changmian Ji<sup>2\*</sup>, Yongzhen Zhao<sup>1\*</sup>, Jinxia Peng<sup>1\*</sup>, Yuhui Xu<sup>2\*</sup>, Xiuli  
Chen<sup>1</sup>, Yin Huang<sup>1</sup>, Qingyun Liu<sup>1</sup>, Pingping He<sup>1</sup>, Pengfei Feng<sup>1</sup>, Chunling Yang<sup>1</sup>, Pinyuan Wei<sup>1</sup>,  
Haiyan Yu<sup>2</sup>, Hongkun Zheng<sup>2#</sup>, Yong Lin<sup>1#</sup>, Xiaohan Chen<sup>1#</sup>

<sup>1</sup> Guangxi Key Laboratory for Aquatic Genetic Breeding and Healthy Aquaculture, Guangxi Academy of  
Fishery Sciences, Nanning, 530021, China

<sup>2</sup> Biomarker Technologies, Beijing, 101300, China.

\* These authors contributed equally to this work.

#Prime correspondence to: Xiaohan Chen, Hongkun zheng and YongLin are also corresponding authors

**Running title:** Golden pompano genome enables discovery of valuable loci of growth

## Address Correspondence to:

Mr. Xiaohan Chen (chnxhn@163.com), and Mr. Yonglin (linnn2005@126.com): NO. 8, Qingshan Road, Guangxi Key  
Laboratory for Aquatic Genetic Breeding and Healthy Aquaculture, Guangxi Institute of Fishery Sciences, Nanning,  
530021, China. Mr. Hongkun zheng (zhenghk@biomarker.com.cn): Biomarker Technologies, Beijing, 101300, China.

26 **Abstract**

27 One important goal of fish genetic breeding is to identify valuable loci and genes that can facilitate growth  
28 and thereby productivity. Few such loci or genes have been identified in golden pompano (*Trachinotus*  
29 *ovatus*), a species of significant economic value. In this study, we produced a high-quality chromosome-  
30 level genome assembly of the golden pompano by *de novo* sequencing and assemblies for 2 parents and  
31 200 F<sub>1</sub> offspring by genome re-sequencing. We exploited these assemblies to identify loci and genes by  
32 QTL mapping, Kompetitive Allele Specific PCR (KASP) genotyping, and haplotype-based regional  
33 association analysis based on growth records of a 64 biparental and 147 individuals from a naturally  
34 occurring population. At a locus 291kb from BSNP21031, we identified a somatostatin receptor type 1-  
35 like (designated as *gpsstr1*) gene in which the BSNP1369 of the promoter region was highly associated  
36 with growth. Loss of *sstr1a*, the homolog of *gpsstr1* in zebrafish, caused growth retardation. *Sstr1a*  
37 mediated growth via *sstr2* and Wnt-gsk-3 $\beta$  signaling pathways. Our findings provide new insights into the  
38 underlying mechanisms controlling growth. Our strategy can serve as an effective way to uncover novel  
39 genomic information and facilitate improvement of fish growth.

40 **Keywords:** Golden pompano genome; QTL mapping; SSTR1, Growth regulation; Wnt-gsk-3 $\beta$

41

42

43

44

45

46

47

48

49

## 50 **Introduction**

51 Genetic breeding for higher growth rate, enhanced stress resistance, and better meat quality is becoming  
52 indispensable for large-scale commercial aquaculture. Molecular breeding is one of the most promising  
53 methods for breeding economically important traits in fish. As one of the most important traits, growth  
54 not only determines the efficiency of fish production, but it is also the basis for optimizing the breeding  
55 cycle. An improvement in growth rate shortens the cycle, leading to lower costs and higher production.  
56 Growth traits are governed by quantitative trait loci (QTLs)<sup>1</sup> and are influenced by both environmental  
57 factors and multiple genes<sup>2</sup>. Benefiting from high-throughput genome sequencing, marker-assisted  
58 selection (MAS) using markers linked to QTLs is much more accurate and efficient in improving growth  
59 traits in comparison to the traditional selective breeding techniques<sup>3,4</sup>. Theoretically, if genes and genetic  
60 markers associated with growth traits are identified, genetic variants or genes could be used as tools in  
61 marker-assisted breeding. Therefore, based on genomic data, genetic linkage maps and molecular genetic  
62 marker techniques have been developed to identify the locations of genes associated with growth traits<sup>1</sup>.  
63 To date, QTL mapping has been widely used to facilitate the identification of quantitative traits, helping  
64 to determine the locations and numbers of linked markers for target traits. Logically, MAS relies on the  
65 precise identification of markers tightly linked to QTLs to assist in phenotypic screening. Therefore,  
66 accurate identification of QTLs associated with phenotypic traits is a prerequisite for MAS in growth-  
67 aimed breeding. Moreover, a high-quality genetic linkage map facilitates QTL mapping for traits with  
68 economic value. During the past decade, QTLs for growth traits have been well studied and documented  
69 in various economically important fish species, such as common carp (*Cyprinus carpio*)<sup>5</sup>, bighead carp<sup>6</sup>,  
70 and Asian seabass (*Lates calcarifer*)<sup>7</sup>. Notably, studies have revealed that growth associated QTLs are  
71 distributed on multiple linkage groups in most cases. For example, in Yangtze River common carp, 21  
72 QTLs were distributed among 8 linkage groups<sup>3</sup>, and in *Lates calcarifer*, 6 QTLs in 6 linkage groups were

73 discovered<sup>7</sup>. However, the usefulness of linkage maps regarding the fine-mapping of QTLs has been  
74 limited due to their low marker density. Single nucleotide polymorphisms (SNPs) solve such an issue  
75 because they can be genotyped on a much larger scale, leading to higher marker density and resolution in  
76 the construction of genetic maps<sup>8</sup>. Although genotyping-by-sequencing (GBS) techniques such as 2b-  
77 RAD<sup>9</sup> and SLAF<sup>10</sup> have been widely applied in discovery of SNP markers throughout the genome<sup>11</sup>,  
78 several flaws have been identified in comparison to whole-genome resequencing methods. Whole-genome  
79 resequencing produces more SNPs with broader coverage of the genome, thereby facilitating the  
80 construction of a higher density linkage map with higher resolution of gene positioning. Therefore, before  
81 the emergence of more advanced methods, whole-genome resequencing appears to be a convenient option  
82 for QTLs identification and gene positioning.

83 Golden pompano (*Trachinotus ovatus*, Linnaeus 1758) is a member of the family Carangidae  
84 (Rafinesque, 1815)<sup>12</sup>. The species is widely distributed and cultured in the Asia-Pacific region, and it has  
85 significant economic importance for offshore cage aquaculture in China and Southeast Asian countries<sup>12</sup>.  
86 Due to its high protein content, low fat, and delicious meat, it is being increasingly recognized by  
87 consumers worldwide. Golden pompano could be one of the most promising marine culture fish in the  
88 future. Notwithstanding the important economic significance of golden pompano, basic research including  
89 molecular breeding, immunology, evolutionary biology, and molecular-genetic association studies in this  
90 species remain largely unexplored due to the lack of high-quality genomic data and accurate gene  
91 annotations. Fortunately, some molecular markers have recently been developed<sup>13, 14</sup>. However, there is  
92 only limited information on important economic traits, such as growth, disease resistance, and  
93 reproduction, owing to the shortage of genetic information in golden pompano. Moreover, although QTLs  
94 identification and gene positioning based on genome sequencing and resequencing have been successfully  
95 applied to various plants and animals, few QTLs or genes associated with growth and other traits have

96 been successfully identified in golden pompano. This greatly restricts the process of molecular breeding  
97 and the sustained development of the golden pompano industry.

98 In this study, we performed *de novo* genome sequencing of an adult golden pompano and re-  
99 sequenced 202 accessions comprising 2 parents and 200 F<sub>1</sub> offspring. We developed a strategy to identify  
100 loci and candidate genes, and finally identified two SNPs, BSNP21031 and BSNP21028, and one  
101 candidate gene annotated as somatostatin receptor type 1-like (designated as *gpsstr1*) that were  
102 significantly correlated with growth. We investigated the functions of *gpsstr1* in a zebrafish model. Loss  
103 of *sstr1a*, the homolog of *gpsstr1* in zebrafish, caused growth retardation and induced phenotypes that lack  
104 the Wnt-gsk-3 $\beta$  signaling. We demonstrated that *sstr1a* mediates growth via *sstr2* and the Wnt-gsk-3 $\beta$   
105 signaling pathway, and the GH-IGF1 axis may regulate the growth defects induced by *sstr1a* via negative  
106 feedback. Our findings provide new insights into the underlying mechanisms controlling growth, and the  
107 results will facilitate molecular breeding of fish.

108

## 109 **Results**

110 ***De novo* genome assembly, annotation, and evolution.** We first estimated the golden pompano genome  
111 size and GC content of golden pompano at 656.98 Mb and 41.54%, respectively, based on 21-Kmer  
112 (Figure S1). We then sequenced and assembled the genome of a female individual through a combination  
113 of three technologies: paired-end sequencing with the Illumina HiSeq platform, single-molecule real time  
114 (SMRT) sequencing with the PacBio Sequel platform, and optical genome mapping with the BioNano  
115 Genomics Saphyr System (Figure S2; Table S1, S2A). An assembly containing 1,490 scaffolds with a  
116 scaffold N50 length of 21.02 Mb was built (Table S1C and S2A). Next, we anchored and oriented the  
117 assembly sequences onto 24 pseudo-molecules, which accounted for ~98.60% (636.61 Mb) of the genome  
118 assembly (Figure S3; Table S1 and S2) according to the interaction frequency mapping of 38.7-fold high-

119 through chromosome conformation capture (Hi-C) data (Table S1d). We finally obtained a genome  
120 assembly containing 645.62 Mb of genomic data composed of 1,536 scaffolds (including 24  
121 pseudochromosomes) with a scaffold N50 size of 20.22 Mb (Table S2b). The quality evaluation of the  
122 assembled genome revealed a high level of contiguity and connectivity for the golden pompano genome  
123 and facilitated further analyses (Table S2, S3; Figure S3). By combining the data from *de novo* assembly,  
124 homologs, and transcriptome approaches, we annotated 24,186 high confidence protein-coding genes, 152  
125 pseudogenes, and 1,274 noncoding RNAs (Table S3, S4 S5 and S6) in comparison to zebrafish (25,642  
126 protein-coding genes). We visualized the genomic landscape of genes, repetitive sequences, genome map  
127 markers, Hi-C data, and GC content of the golden pompano genome using Circos<sup>15</sup> (Figure 1). As expected,  
128 the repetitive elements accumulated in low gene density regions (Figure 1AB). The optical markers and  
129 Hi-C data were evenly distributed across the genome (Figure 1CD), as was GC content (Figure 1E).  
130 Detailed genomic data can be found in the supplementary information (Table S7-S17).

131  
132 To examine the evolutionary position of the golden pompano, we reconstructed the evolutionary history  
133 of teleost fishes. Phylogenies strongly supported the traditional classification of the golden pompano as  
134 belonging to the Carangidae. Golden pompano is a sister of *Seriola dumerilie*, and they diverged  
135 approximately 59.99 Mya (Figure 2A). Gene family analyses showed that Perciformes and zebrafish  
136 shared 9,412 families, and the number of species-specific families in Perciformes was apparently lower  
137 than in zebrafish (Figure S4). Assuming a constant rate of silent substitutions (dS)<sup>16</sup> of 1.5e-8, we  
138 estimated the dates of Ts3R and Ss4R at 350 Mya and 96 Mya, respectively (Figure 2B). Genome  
139 collinearity comparison among spotted gar karyotypes (preserved in the golden pompano genome) showed  
140 that 894 pairs of paralogous genes that were inherited from the Ts3R event (ohnologues) retained a double-  
141 conserved synteny block in the golden pompano genome (Figure 2C, and Table S18), implying that teleost-

142 ancestral karyotypes were considerably conserved in post-Ts3R rediploidization with large fissions,  
143 fusions, or translocations (Figure 2D). Next, we classified the Ts3R subgenomes according to the integrity  
144 of gene as belonging to the LF, MF, and Other subgenomes<sup>17</sup>. The component of rediploidization-driven  
145 subgenomes (LF, MF, and Other) was unequally distributed among golden pompano subgenomes (Figure  
146 2E, and Figure S5), suggesting an asymmetric retention of ancestral subgenomes in teleosts, a  
147 phenomenon that is commonly observed in plants<sup>18, 19</sup>. Detail descriptions concerning subgenomes and  
148 evolution can be found in the supplementary information.

149  
150 **Phenotype variation analysis.** We constructed a full-sib family population (FSF), and 200 offspring were  
151 randomly selected. Their body weight, full length, body length, and body height were used as indicators  
152 of growth traits of the golden pompano, and these phenotypes were identified and recorded at three  
153 different time points during cultivation. Among all of the phenotypes, the variance of body weight at the  
154 three time points was larger than for other phenotypes, and body weight<sub>1026</sub> had the largest kurtosis and  
155 CV (Table S19). Comparing the phenotypic data, the other three phenotypes are more stable (Figure 3A;  
156 Table S19). Normality analysis showed that Body weight<sub>1026</sub>, Full length<sub>1011</sub>, Full length<sub>1026</sub>, Body  
157 length<sub>0925</sub> and Body length<sub>1026</sub> were in accordance with normal distributions (Figure 3A; Table S19).

158  
159 **Variation detection and genetic mapping.** By Illumina re-sequencing, we obtained a total of about 222  
160 Gb clean data. The average sequencing depths of the parents were 14X and 13X, and the average  
161 sequencing depth of each offspring was 2X. A total of 579360 SNPs and 171808 InDels were detected  
162 between the parents (Figure S6A). Genome annotations showed that more than 40% of SNPs and InDels  
163 were located in the intergenic regions. The proportion of synonymous and non-synonymous SNPs in the  
164 gene region was 1:1 (Figure S6B), and most InDels caused frameshift mutations (Figure S6C). We next  
165 developed bin markers based on SNP data, and a total of 4103 high-quality bin markers were obtained

166 after filtering. The largest bin size was 1.86 Mb, and the average bin size was 91.44 Kb. A genetic linkage  
167 map of golden pompano covering 1707.41 cM map distance was constructed by using these bin markers,  
168 with an average of 171 bin markers per linkage group and an average genetic distance of 0.41cM ([Figure](#)  
169 [6C](#); [Table S20](#)). The collinearity and heat map analyses showed that the bin mark order and genetic  
170 distance calculation of the genetic map were relatively accurate and could be used for downstream QTL  
171 mapping and other analysis ([Figure S7](#)).

172

### 173 **QTL mapping, fine mapping and candidate gene screening**

174 Next, we wanted to screen a candidate gene that was associated with growth based on the obtained SNPs.  
175 We firstly performed QTL mapping by using growth-related phenotypes and genetic linkage maps. A total  
176 of 25 QTLs were mapped to the 12 phenotypes and were distributed in linkage groups 6, 8, 9, 14, 15, 16,  
177 18, 20, and 23 ([Table S21](#)). Thirteen QTLs could be repeatedly detected, namely, qFL8, qFL9, qFL23 for  
178 full length, qBH9, qBH18, and qBH23 for body height, qBL9 and qBL23 for body length, and qBW9,  
179 qBW15, qBW18, qBW20, and qBW23 for body weight. There were three overlapping QTL intervals,  
180 qFL9, qBH9, qBL9, and qBW9 in linkage group 9, qBH18 and qBW18 in linkage group 18, and qFL23,  
181 qBH23, qBL23, and qBW23 in linkage group 23 ([Figure 3B](#)), implying that there is a phenomenon of one  
182 cause for multiple effects in the causal genes of the three intervals. The above three intervals had high  
183 confidence, indicating that were the key QTLs that we needed to clone. In order to further confirm and  
184 fine map these QTLs, we designed a total of nine KASP markers in these three QTL intervals, including  
185 two QTL intervals on linkage group 18, two QTL intervals on linkage group 9, and five QTL intervals in  
186 the linkage group 23 ([Table S22](#)). We then continued the genotyping in 64 F1 populations and found that  
187 the results of these 10 KASP genotyping were consistent with the SNPs results of parental sequencing,  
188 indicating the reliability of the SNP sequencing results. However, Wilcoxon tests showed that only



189 BSNP133 and BSNP135 in linkage group 23 were significantly correlated with body length ( $0.019 \leq p \leq$   
190  $0.041$ , [Figure 3C](#)). BSNP133, with a physical distance of 322.17 Kb, and BSNP135, with a physical  
191 distance of 351.41 Kb, were located in Block 6813 and Block 6821, respectively. In order to further  
192 confirm this positioning, we collected 147 individuals from a natural population and designed 14 evenly  
193 distributed KASP markers between Block 6813 and Block 6821 (between 16730073-17600034 on the  
194 genome). We found that the peak SNP BSNP21031 (17199635) located in Block 6821 was extremely  
195 significantly correlated with body weight and full length, and BSNP21028 (16866882) located in Block  
196 6813 was extremely significantly correlated with body weight and body length ([Figure 3D](#)) by using  
197 hapQTL association analysis. No non-synonymous mutations were found in the Block 6813 interval  
198 between the parents. In Block 6821, only one non-synonymous mutation site on EVM0019027 was found,  
199 but no GO or KEGG terms were enriched. At a distance of 291kb from the BSNP21031 locus, we found  
200 a gene EVM0001630 that was annotated as somatostatin receptor type 1-like (K04217) with somatostatin  
201 receptor activity (GO:0004994) in Block6821, which clearly suggests a role in the growth process ([Table](#)  
202 [S23](#)). We further found seven SNPs near gene EVM0001630 (17491064-17492170) among which there  
203 was a mutation BSNP1369 (G→C, 17489695, [Figure 3D](#)) in the promoter region of EVM0001630. This  
204 SNP was verified by Sanger sequencing of the promoter region of EVM0001630 ([Table S24](#)) and was  
205 significantly correlated with body weight, body height, full length, and body length ([Figure 3D](#)). This  
206 indicates that the gene EVM0001630 with SNP (BSNP1369) in the promotor may be a candidate gene  
207 that is associated with growth.

208

### 209 ***Gpsstr1*, tightly associated with growth, is a conserved homologue of zebrafish *sstr1a***

210 We designated EVM0001630 (somatostatin receptor type 1-like) gene as *gpsstr1*. Then, we asked whether  
211 *gpsstr1* was associated with growth of golden pompano. First, we detected the mRNA level of *gpsstr1* in

212 64 individuals and found that it was significantly higher in fish growing slowly than those growing rapidly.  
213 Similarly, its expression level was much higher in slow-growing individuals than fast-growing fish in  
214 individuals from a natural population. We next examined the protein level of SSTR1 in six fast- and slow-  
215 growing fish selected from the 64 family groups by Western blotting, and the protein expression profiles  
216 resembled the mRNA profiles in the family or natural populations (Figure 4A). These data imply that  
217 *gpsstr1* is tightly associated with growth of the golden pompano. We also detected the distribution of  
218 *gpsstr1* in golden pompano by qPCR and RT-PCR, and we found that it was widely distributed in all of  
219 the tested embryo stages, with much higher expression in the formation of the eye lens (FELS) embryo  
220 stage, where it was highly expressed in brain, ovary (females), and testis (male) but not in the eye, spleen,  
221 or heart (Figure 4B). We speculated as to its biological functions; this needed an ideal fish as a research  
222 model. The zebrafish has long been used as such an ideal model, so we needed to address whether there  
223 was a homolog of *gpsstr1* in the zebrafish. We searched for a homolog of *gpsstr1* in the NCBI database by  
224 BLASTp: only one gene, *sstr1a* (mRNA: XM\_691574.8; protein: XP\_696666.1) shared 62.8% similarity  
225 at the amino acid level in zebrafish (Figure 4C). Both proteins possess the same conserved domain 7tm\_1  
226 (pfam0001) and SSTR1 protein signature motifs YANSCANPILY and DRY (Figure S8). Also, the  
227 simulated 3D structures of both proteins were highly similar (Figure S9). These results suggested that  
228 *gpsstr1* and zebrafish *sstr1a* are highly conserved and that they may have similar biological functions.  
229 Therefore, we speculated as to the functions of *sstr1*.

### 230 231 **Loss of *sstr1a* causes growth defects in zebrafish**

232 Next, we addressed the function of *sstr1* in fish growth by using the zebrafish model, a system that has  
233 been a valuable tool for functional research in vertebrates due to its high similarity in fishes and other  
234 vertebrates<sup>20</sup>. First, we investigated whether loss of *sstr1a* affects growth traits in zebrafish using a

235 morpholino micro-injection strategy (Figure 5A). We constructed a pcDNA3.1-sstr1a-EGFP fluorescein  
236 reporter system containing sstr1a-ATG-MO (morpholino, MO; sstr1a contains only one exon, and thus  
237 only ATG-MO was designed) and tested its site-specific effect when injected into zebrafish at 24 hours  
238 post fertilization (hpf). As shown in Figure 5BC, compared to the control embryos, the green fluorescence  
239 in embryos that were co-injected with *sstr1a*-ATG-MO decreased dramatically, confirming the high  
240 efficiency of sstr1a-ATG-MO (Figure 5BC). Next, we examined the effects of sstr1a depletion on the  
241 growth of zebrafish, and we observed that sstr1a depletion caused growth defects manifested as significant  
242 decreases of body length and eyeball size compared to controls (Figure 5D). Furthermore, loss of sstr1a  
243 resulted in a high percentage of embryo defects (100%, n=323) and caused phenotypes such as small eye,  
244 dorsalized, headless, and pericardial edema at two days post fertilization (dpf) compared with controls  
245 (Figure 5E). This confirmed that knockdown of sstr1a affects growth in zebrafish.

246

### 247 **The GH-IGF axis may negative regulate sstr1-induced growth defects**

248 The growth hormone-insulin-like growth factor (GH-IGF) system plays a major role in coordinating the  
249 growth of fish<sup>21, 22</sup>. Numerous research studies of fish growth have focused on the growth hormone (GH),  
250 a component of the GH-IGF system of fish. This system not only includes GH receptors (GHR), IGF  
251 receptors (IGFR), GH binding proteins (GHBP), and IGF binding protein (IGFBP), but it also consists of  
252 multiple subtypes of GHRs, IGFBPs, and IG-FRs<sup>23, 24</sup>. These components are broadly distributed and  
253 interact to coordinate growth and other essential biological processes. As the GH-IGF1 axis has been  
254 demonstrated to be closely associated with hormone production and affects growth processes in  
255 vertebrates<sup>23</sup>, we supposed that the sstr1a-caused growth defects might also be associated with the GH-  
256 IGF axis. We next examined the expression levels of the growth markers *igf1*, *igf2a*, *ghra*, *gh1*, and *stat5.1*  
257 in zebrafish. We found that sstr1a depletion resulted in a significant decrease of *gh1* expression compared

258 with normal fish. However, loss of *sstr1a* significantly increased the expression levels of *igf1*, *igf2a*, *ghra*,  
259 and *stat5.1* at the mRNA level and IGF1 at the protein level compared to controls (Figure 6A). RNA-seq  
260 data also corroborated this upregulation tendency of some GH-IGF-related genes, including *ghrb*, *igf2a*,  
261 and *stat5a*, upon *sstr1a* depletion, (Table S25). The decrease of *sstr1a* released the inhibition of the GH-  
262 IGF system, and this consequently resulted in larger body length and eyeball size. However, our fish  
263 exhibited opposite phenotypes. This may suggest that *sstr1a* does not directly act via regulation of the GH-  
264 IGF system. Given that the GH-IGF axis positively regulates growth<sup>23</sup>, our data demonstrate that this axis  
265 more likely negatively regulates the growth phenotypes induced by *sstr1a* knockdown.

266

### 267 **Sstr1 mediates growth via *sstr2* and the Wnt-gsk-3 $\beta$ signaling pathway**

268 Since the GH-IGF could not fully explain the growth phenotypes such as body length decrease and eyeball  
269 diminution, we next examined the expression of *sstr2*, a protein that forms a heterodimer with *sstr1*<sup>25</sup> and  
270 that is negatively regulated by *sstr1*<sup>26</sup> and positively associated with growth regulation<sup>27</sup>. We found that  
271 when *sstr1a* was knocked down in zebrafish, the mRNA expression of *sstr2* increased significantly  
272 compared with the controls, and the protein level of *sstr2* also increased when *sstr1a* was silenced (Figure  
273 6B). This is consistent with the previous research reporting that loss of *sstr1* in mice resulted in an increase  
274 of *sstr2* retinal expression as well as enhanced *sstr2* function. This suggests an inhibitory role of *sstr1* on  
275 *sstr2* expression<sup>26, 28, 29</sup>. As it has been reported that *sstr2* plays a more important role in regulating animal  
276 growth than *sstr1*<sup>27</sup>, we wondered whether golden pompano *sstr2* (designated as *gpsstl2*) was associated  
277 with growth. The *sstr2* mRNA levels in fast- and slow-growing golden pompano were quantified by qPCR;  
278 the results showed that it was significantly higher in slow-growing fish than that in fast-growing fish. This  
279 strongly suggests that *gpsstl2* is tightly related to growth of golden pompano, consistent with previous  
280 research<sup>27</sup>. This also suggests that *gpsstl2* rather than *gpsstr1* may directly control growth in golden

281 pompano. Therefore, the upregulation of zebrafish *sstr2* in our study partly explains the retarded growth  
282 induced by *sstr1a* depletion. However, this could not explain the phenotypes such as small eye, dorsalized,  
283 and headless in zebrafish. We noticed that these phenotypes are characteristic of dorsalization and  
284 resemble those phenotypes seen in embryos that lack Wnt signaling<sup>30,31</sup>. This suggests that *sstr1a* might  
285 function via the Wnt signaling pathway. To validate this conjecture, we analyzed the RNA-seq of zebrafish  
286 embryos upon *sstr1a* depletion and found that the transcriptome data presented a large amount of  
287 differentially expressed Wnt-signaling genes enriched after *sstr1a* depletion (Figure 6C; Figure S10; Table  
288 S25), suggesting that loss of *sstr1a* affects the Wnt signaling pathway. Next, we examined the key genes  
289 in the Wnt-signaling pathway,  $\beta$ -catenin and *gsk-3 $\beta$* , and found that both were decreased significantly  
290 upon *sstr1a* depletion compared with controls (Figure 6C). To further verify our hypothesis, we knocked  
291 down the *gsk-3 $\beta$*  gene in zebrafish using the morpholino technique to determine whether loss of *gsk-3 $\beta$*   
292 phenocopies *sstr1a* deficiency. After testing the efficiency of *gsk-3 $\beta$* -MO (Figure S11), we injected 4 ng  
293 *gsk-3 $\beta$* -MO in embryos and observed that loss of *gsk-3 $\beta$*  caused growth defects manifested as significant  
294 decreases of body length and eyeball size compared to controls (Figure 6D). Furthermore, *gsk-3 $\beta$*   
295 depletion resulted in a high percentage of embryo defects (100%, n=106) and produced the phenotypes  
296 small eye, dorsalized, headless, and pericardial edema at 2 dpf (Figure 6E) compared with controls. These  
297 results indicate that *gsk-3 $\beta$*  depletion not only led to growth defects similar to those observed from *sstr1a*  
298 depletion (decreased body length and eyeball size) but also phenocopied the *sstr1a* deficiency (small eye,  
299 dorsalized, headless, and pericardial edema). This suggests that *sstr1a* functions via the Wnt-*gsk-3 $\beta$*   
300 pathway. To further validate this, we examined the mRNA expression of genes in the Wnt-signaling  
301 pathway upon *sstr1a* depletion, and we found that most of the key genes including *wnt9a*, *irp5*, *frzb*, *lef1*,  
302 *myca*, *cox2*, and *axin2* were significantly downregulated, while *dkk1b* and *wnt8a* were sharply  
303 upregulated compared to controls (Figure 6F). Finally, we silenced the *sstr1* gene in 293T cells using

304 siRNA and monitored the expression levels of the key proteins by Western blotting. The bands showed  
305 that the protein levels of WNT9A, GSK-3 $\beta$ ,  $\beta$ -Catenin, and SSTR1 decreased, while DKK1 increased.  
306 This was consistent with the corresponding mRNA expression profiles, except for AXIN2 that was almost  
307 unchanged at the protein level (Figure 6G). Based on these data together with evidence of  
308 heterodimerization of sstr1 and sstr2<sup>25</sup>, we concluded that sstr1a plays a role in growth regulation through  
309 sstr2 and the Wnt-gsk-3 $\beta$  signaling pathway. To this end, we attempted to delineate the possible  
310 mechanism by which sstr1 mediates growth by bridging the Wnt signaling and GH-IGF axis (Figure 7).  
311 Briefly, our data indicated that sstr1 depletion may on the one hand activate sstr2 and decrease gh1 to  
312 inhibit growth and upregulate igf1, igf2a, and ghra to suppress such over-inhibition via negatively  
313 feedback. On the other hand, sstr1 depletion downregulated Wnt-gsk-3 $\beta$  signaling, which explains the  
314 phenotypes of growth delay, small eyes, pericardial edema, and tail patterning defects observed under sstr1  
315 depletion.

316

## 317 Discussion

318 In this study, we obtained a high-quality chromosome-level genome of the golden pompano by performing  
319 *de novo* genome sequencing. This genomic resource not only provides a high-value reference genome for  
320 functional genomics studies of golden pompano, such as exploration of economic traits and sex  
321 determination, but it also offers an important platform for studies in other fundamental fields such as  
322 immunology, molecular biology, and evolutionary biology. We also found that the golden pompano  
323 genome, as in other teleosts, underwent the Ts3R whole-genome duplication (WGD) event that resulted  
324 in biased-subgenomes retention. This also provides clues for research on fish physiological and  
325 morphological evolution<sup>32</sup>, evolutionary embryology, and WGD-derived subgenome evolution<sup>33, 34</sup>.  
326 Therefore, from the point of view of basic research, this genomic resource may help to strengthen the

327 development of the golden pompano industry.

328 One important goal of genomic and genetic studies of cultured fishes is to identify important loci and  
329 genes that can be used to improve economic traits and thereby productivity. Growth determines the  
330 efficiency of fish production. Growth-related traits are governed by quantitative trait loci (QTLs). In this  
331 study, in order to map causal genes responsible for growth-related traits, we designed an experimental  
332 process that combined construction of a biparental population and a natural population with whole-genome  
333 resequencing-based QTL mapping methods and haplotype-based regional association analysis. The  
334 process includes: (i) the detection of QTLs through linkage analysis with genome-wide nucleotide  
335 polymorphisms; (ii) the confirmation of QTLs with SNP-derived Kompetitive Allele Specific PCR (KASP)  
336 markers; (iii) the QTL fine mapping of significant signals based on association analysis with newly  
337 designed KASP markers using the natural population; (iv) the extraction of causal genes based on the  
338 annotation of polymorphisms and function enrichment information (GO and KEGG), including that of  
339 zebrafish homologs as in the case of EVM0001630 (designated as *gpsstr1*); (v) candidate gene  
340 confirmation through DNA cloning by Sanger sequencing; and (vi) functional and mechanistic analysis of  
341 candidate genes in a zebrafish model. As expected, we identified two SNPs in steps ii and iii after detection  
342 of 25 QTLs, BSNP21031 and BSNP21028, that were associated with body weight and full length and  
343 body weight and body length, respectively. Near BSNP21031 (about 291kb), we extracted one causal gene,  
344 *gpsstr1*, that was annotated as somatostatin receptor type 1-like, implying its important role in the growth  
345 process. Notably, one SNP, BSNP1369 in the promoter region of *gpsstr1*, was significantly correlated with  
346 growth of golden pompano, supporting the conclusions from the above strategies. To this end, we finally  
347 identified a target candidate gene, and this indicated that our QTL mapping and fine mapping strategy  
348 using F<sub>1</sub> individuals together with fish from a natural population was reliable and feasible. To our  
349 knowledge, this is the first report of QTL fine mapping and candidate gene screening on growth traits of

350 golden pompano (*T. ovatus*) based on whole-genome sequencing and re-sequencing data, although several  
351 genetic markers have been documented previously<sup>35,36</sup>.

352 Growth is a polygenic trait influenced by multiple physiological pathways. Genes of the GH-IGF  
353 axis are thought to have the greatest influence on growth among the possible growth-regulating pathways  
354 in vertebrates (including fishes). A number of growth hormones such as somatostatin, insulin, and sex  
355 steroids modulate the growth process in fishes via the GH-IGF system<sup>21</sup>. Recently, polymorphisms of the  
356 QTL-related candidate genes associated with the GH-IGF system have been demonstrated to be closely  
357 associated with growth in fish, for example GHR2 in tilapia<sup>37</sup> and GH in Arctic char<sup>38</sup>. As one of the most  
358 important inhibitors of the GH-IGF system, somatostatin receptor (sstr) genes have seldom been reported  
359 in association with growth-aimed breeding in fish. Sstrs participate in regulation of a variety of hormones.  
360 Their regulatory effects are closely related to growth, neurology, immunity, and disease<sup>27</sup>. It is significant  
361 to study their functions, mechanisms, and relationships with growth. At present, research on sstrs is mainly  
362 focused on mammals, with few studies in fishes. Five sstrs have been identified in mammals. Sstr2 and  
363 sstr5 rather than sstr1 and sstr3 play important roles in regulation of animal growth and inhibition of GH  
364 and insulin<sup>27</sup>. In fishes, only four sstrs (sstr1, 2, 3, and 5) have been discovered. Studies of their association  
365 with growth have seldom been reported, except for a study on the association of sstr2 with body size in  
366 African cichlid fish<sup>39</sup>. In this study, we identified the gpsstr1 gene as one of the sstr subtypes of fish not  
367 only because it possesses a conserved seven transmembrane domain but also through the signature motifs  
368 YANSCANPILY and DRY, as all sstrs possess<sup>27</sup>. Our data showed that gpsstr1 was negatively associated  
369 with golden pompano growth in both F<sub>1</sub> fish and those from a natural population. The gpsstr2 expression  
370 exhibited a similar profile to that of gpsstr1. This is consistent with the general characteristics of sstr1 and  
371 sstr2 having inhibitory functions on the growth process<sup>40,41</sup>. To the best of our knowledge, this is the first  
372 growth-related phenotype in sstr1-deleted zebrafish, although phenotypes of altered glucose and insulin



373 homeostasis were previously documented in *ssr1*-ablated mice<sup>42</sup>. However, the phenotypes induced by  
374 *ssr1a* depletion in zebrafish were outside the expected forms given the inhibitory function of *ssr1* on  
375 growth. The depletion of *ssr1* was expected to lead to rapid growth. However, loss of *ssr1a* caused  
376 opposite phenotypes. This implies that additional factors may be involved in this process, or that *ssr1a*  
377 plays different roles during embryo and adult stages. Fortunately, we found that *ssr1a* depletion activated  
378 *ssr2* and decreased *gh1* expression. This is consistent with the previous report that *ssr2* activation is  
379 related to inhibition of GH release in fish<sup>27, 41, 43, 44</sup>. Also, previous research suggested that *ssr2* plays a  
380 much more important role in growth regulation than *ssr1*<sup>27</sup>. Consequently, in this study the activation of  
381 *ssr2* upon *ssr1* depletion enhanced the inhibition of GH1 release; this explains the retarded growth  
382 phenotypes. However, loss of *ssr1a* simultaneously increased the other four key genes in the GH-IGF  
383 axis. Their upregulation could not explain the retarded growth phenotypes. This implies the existence of  
384 new downstream signaling pathways of *ssr2* in addition to the GH-IGF axis. We found that the  
385 upregulation of the key genes in the GH-IGF axis was not the main mechanism for the phenotypes induced  
386 upon *ssr1a* depletion. The decreased inhibition of *ssr1a* is supposed to result in the upregulation of GHs;  
387 however, this upregulation should logically promote and not hinder growth. Considering the complexity  
388 of growth regulatory networks, based on our current data, we prefer to consider that such upregulation is  
389 a negative feedback mechanism in which the *ssr1a* depletion induced retarded growth. More investigation  
390 is needed to clarify the mechanism behind these results; this will be a focus of future work.

391 Our study highlights the important discovery of regulatory roles of *ssr1* on the downstream Wnt-  
392 *gsk-3 $\beta$*  signaling pathway. Wnt signaling plays multiple roles in the control of cell proliferation,  
393 differentiation, specification, and growth and maturation of most tissues during embryonic development  
394 and adult tissue homeostasis in animals<sup>45, 46, 47, 48, 49, 50</sup>. As supporting evidence, a novel role for Wnt and  
395 TGF $\beta$  in regulating size-dependent growth was recently identified in planarian flatworms, highlighting

396 the function of Wnt signaling on growth modulation by coordinating other signaling pathways<sup>51</sup>. Previous  
397 studies showed that the mammalian sstrs are mainly involved in the following pathways: cyclic adenylylate  
398 (cAMP), voltage-dependent Ca<sup>2+</sup> channel, mitogen-activated protein kinase (MAPK), and protein tyrosine  
399 phosphatase (PTP) pathways<sup>27</sup>. Still, the downstream signaling pathways of sstrs are largely unclear. To  
400 date, no direct evidence has been provided for the correlations of sstrs with the Wnt-gsk-3 $\beta$  pathway in  
401 regulation of animal growth. Only one previous report mentioned that Octreotide (one somatostatin analog  
402 peptide) but not sstr activates gsk-3 $\beta$ <sup>52</sup>. In our study, the unique phenotype of dorsalization induced by  
403 sstr1 depletion resembled the signature phenotype of Wnt signaling<sup>30, 31</sup>. Such a dorsalization phenotype  
404 has never been documented in sstr1-ablated mice or other animals. Moreover, loss of gsk-3 $\beta$  duplicated  
405 the sstr1a-induced phenotypes, together with the significant downregulations of key genes in Wnt signaling  
406 pathway, again strongly suggest that sstr1 mediates growth through the Wnt-gsk-3 $\beta$  signaling pathway. In  
407 our study, although the lack of commercial antibodies of zebrafish and golden pompano impeded the  
408 examination of protein levels of sstr1 and key genes in the Wnt-gsk-3 $\beta$  signaling pathway *in vivo*, the  
409 Western blotting in 293T cells supported our hypothesis that sstr1 mediates Wnt signal transduction. To  
410 the best of our knowledge, this is the first report of sstr1 regulating downstream Wnt-gsk-3 $\beta$  signaling  
411 pathway. From this point of view, our study may open a new window on sstr1 research, although some  
412 questions need to be answered in the future, such as whether more genes are involved, which genes in the  
413 Wnt pathway directly interact with sstr1, and how the GH-IGF axis cross-talks with the sstr1-Wnt-gsk-3 $\beta$   
414 signaling pathway.

415 In summary, we have developed an efficient strategy that combines construction of a biparental  
416 population and a natural population with whole-genome-resequencing-based QTL mapping methods and  
417 haplotype-based regional association analysis. This strategy can greatly enhance the efficiency of  
418 uncovering QTLs and genes for beneficial economic traits in fish. By using this strategy, we were able to

419 identify a candidate gene for growth regulation, and we validated the candidate via gene knockdown tests  
420 in a zebrafish model. Notably, to our best knowledge, this is the first report identifying the candidate gene  
421 *sstr1* as having a role in the growth process via regulation of downstream Wnt-gsk-3 $\beta$  signaling pathway  
422 as well as the first report of headless and dorsalization phenotypes caused by *sstr1a*. Clearly, this study  
423 has provided valuable new insights into the underlying mechanism of the growth process. Our study will  
424 further enable the molecular manipulation of desirable economic traits of fishes via precise targeting of  
425 the causative genes that are relevant to economically important traits.

426

## 427 **Materials and Methods**

### 428 **K-mer analysis for estimating the genome size**

429 We generated a total of 426,220,510 sequence reads for one female individual corresponding to 63.92 Gb  
430 of clean data from two 270-bp short insert-size libraries. To estimate the genome characteristics, we  
431 obtained 52,515,035,178 21-mers using these short reads. The genome size (G) is correlated with the 21-  
432 mer number (N) and the peak of 21-mer frequency (D). Their relationship can be expressed in an empirical  
433 formula:  $G = N / D$ . The kmer density distribution showed that the peak emerged at about 80 kmer-  
434 coverage. The estimated genome size was 656.46 Mb ([Figure S1](#)), which was close to the assembled  
435 genome size. By taking the estimated genome size as a reference, total sequence data accounted for an  
436 ~247-fold genome coverage ([Table S1a](#)).

437

### 438 **Genomic DNA preparation and sequencing**

439 One healthy female individual collected from Nanao Town, Dapeng District, Shenzhen City, Guangdong  
440 Province, China was used for *de novo* genome sequencing. Genomic DNA was extracted from the muscles  
441 of the female adult golden pompano using the Blood & Cell Culture DNA Mini Kit (Qiagen). DNA  
442 concentrations and quality were measured using a NanoDrop 2000 (Thermo) and a Qbit Fluorometer  
443 (Thermo Fisher), respectively. Library preparation and quality assessments were conducted according to

444 the standard protocol of the HiSeq 4000 platform (Illumina, USA). Three short fragment paired-end  
445 libraries (mean insert sizes: 270 bp and 500 bp) and nine mate-paired libraries (mean insert sizes: 3 Kb, 4  
446 Kb, 8 Kb, 10 Kb, 15 Kb, and 17 Kb) were constructed using the Illumina standard pipeline ([Table S1a](#)).  
447 All of the libraries were sequenced on the Illumina HiSeq 4000 platform (Illumina, USA) to generate  
448 approximately 160 Gb data representing 247.83-fold genome coverage ([Table S1a](#)).

449

## 450 **Genome assembly**

451 Raw data were filtered by the following criteria: (1) paired-reads with an ambiguous nucleotide ratio  
452 greater than 5% were deleted; (2) low-quality reads with a mean PHRED score < 20% (referring to  
453 sequencing error rates < 1%) were filtered; (3) reads with adapter contamination were deleted; (4)  
454 duplicate reads for mate-end libraries were deleted. We generated approximately 160 Gb of clean data,  
455 accounting for approximately a 246-fold coverage of the estimated genome size ([Table S1a](#)). Illumina  
456 sequences from short insert fragments and mate-paired reads including 270 bp, 500 bp, 3 Kb, 4 Kb, 8 Kb,  
457 10 Kb, 15 Kb, and 17 Kb insert size libraries were initially assembled with ALLpaths-LG (allpathslg-  
458 52488)<sup>53</sup> and then scaffolded using SSPACE-standard (v3.0)<sup>54</sup> ([Table S2a](#)). Taking advantage of single-  
459 molecule real time (SMRT) sequencing technology, ~4.32 Gb PacBio RSII long reads were generated  
460 from the same individual for gap filling to further improve the genome contiguity ([Tables S1b and S2a](#)).

461

## 462 **Genomic map construction using Bionano data**

463 To develop a robust physical map of the golden pompano genome that could help place and order  
464 contigs/scaffolds on chromosomes and to determine the physical lengths of gaps between the contigs, we  
465 constructed BioNano optical genome map libraries for the sequenced individual. The enzyme density and  
466 distribution assessment of genome sequences were estimated using Label Density Calculator v1.3.0  
467 (BioNano Genomics, USA). High-molecular weight DNA was extracted from blood with a Bionano Plant  
468 Tissue DNA isolation kit (Bionano Genomics) and digested with Nt.BspQI nickase (New England  
469 Biolabs). After labeling and staining, DNA was loaded onto the Irys chip for sequencing. The basic

470 processing of BioNano raw data was conducted using the IrysView v2.5.1 package (BioNano Genomics).  
471 Molecules whose length was above 100 kb (with label SNR  $\geq 3.0$  and average molecule intensity  $< 0.6$ )  
472 were retained for further genome map assembly. A total of 130 Gb high quality optical molecules (508,213  
473 molecules) that accounted for a 200-fold genome coverage (Table S1c) were collected and converted into  
474 a BNX file by AutoDetect software to obtain basic labeling and DNA length information. The high-quality  
475 DNA molecules in BNX format were aligned, clustered, and assembled into a BNG map by using the  
476 Bionano Genomics assembly pipeline. The alignment of sequence assemblies with the BNG map were  
477 computed with RefAligner, and visualization of alignment was performed with snapshot in IrysView.  
478 Based on the Label position on the single DNA molecules, *de novo* assembly was performed by a pairwise  
479 comparison of all single molecules and overlap-layout-consensus path building, which was performed by  
480 Irys-scaffolding in the IrysView v2.5.1 package. We considered only molecules containing more than  
481 seven nicking enzyme sites for assembly (min label per molecule: 8). A *P* value threshold of  $1e-8$  was set  
482 during the pairwise assembly, and values of  $1e-9$  for extension and refinement steps and  $1e-12$  for merging  
483 contigs were adopted. The resulting physical map covered approximately 725.16 Mb. We generated 580  
484 optical maps with N50 of 2.05 Mb (Table S1c). The high-quality optical map was used for genome curation  
485 and hybrid assembly with SMRT-based assembly, combining the meta-pair (MP) links and HiC data.

486

### 487 **Hybrid assembly and gap polishing**

488 Combination of the genome maps with the initial assembly to produce a hybrid scaffold was performed  
489 sequentially. From the comparison between the contigs/scaffolds and optical maps by RefAligner v5122  
490 (Bionano genomics software downloads: <https://bionanogenomics.com/support/software-downloads/>), we  
491 assembled the 1,490 hybrid scaffolds based on a genome map hybrid assembly with an N50 size of 21.02  
492 Mb (Table S2a). The intra-scaffold gaps were further filled with corrected PacBio long reads using PBJelly  
493 (PBSuite v15.2.20. beta)<sup>55</sup> (Figure S2 and Table S2a).

494

### 495 **Chromosome construction using Hi-C links**

496 Hi-C technology enables the generation of genome-wide 3D proximity maps and is an efficient and low-  
497 cost strategy for clustering, ordering, and orienting sequences during pseudomolecule construction<sup>56</sup>. We  
498 constructed Hi-C fragment libraries from muscle tissue for the same female individual. Libraries (based  
499 on HindIII) of fragments ranging from 300 to 700 bp sizes were constructed and sequenced using the  
500 Illumina X-TEN platform (Illumina, USA). Mapping of Hi-C reads and assignment to restriction  
501 fragments were performed as described elsewhere<sup>56</sup>. Briefly, adapter sequences of raw reads were trimmed  
502 with cutadapt v1.0, and low-quality paired-end (PE) reads were removed for raw data processing. The  
503 24.98 Gb clean Hi-C reads, accounting for ~38.7-fold coverage of the golden pompano genome, were  
504 mapped to assembly results using bwa align v0.7.10<sup>57</sup> with default parameters (Table S1d). Only uniquely  
505 aligned pairs of reads whose map quality was > 20 were considered for chromosome construction.  
506 Duplicate removal, sorting, and quality assessment were performed with HiC-Pro v2.8.1<sup>58</sup> with the  
507 command “HiC-Pro\_2.10.0/scripts/mapped\_2hic\_fragments.py -v -S -s 100 -l 1000 -a -f -r -o”. After data  
508 assessment, the percentage of valid interaction pairs of Hi-C data was 89.8%. Raw counts of Hi-C links  
509 were aggregated in 50-kb bins and normalized separately for intra- and inter-chromosomal contacts using  
510 HiC-Pro<sup>58</sup>. A pre-assembly was performed for error correction (chimeric errors) from contigs/scaffolds.  
511 Any two bins showing an inconsistent connection with information from the raw sequences were split into  
512 two fragments for reassembling. These corrected contigs/scaffolds were then assembled using  
513 LACHESIS<sup>56</sup>. Hi-C data were mapped to chromosomes, and placement and orientation errors exhibiting  
514 obvious discrete chromatin interaction patterns were manually adjusted. We clustered the sequences into  
515 an initial set of 24 groups according to thresholds of the contact frequency. Then, LACHESIS was used to  
516 assign the order and orientation of each group. The vast majority (99.56%, 636.6 Mb) of the assembled  
517 sequences were anchored onto the 24 pseudo-chromosomes (Figure S3 and Table S2b).

## 518

### 519 **Quality assessment for assembly results**

520 The genome completeness and accuracy were assessed by four data sets: Pacbio sub-reads, BUSCO<sup>59</sup>,  
521 RNAseq data and Hi-C data. The assembled contigs were supported by more than 98% average sequence

522 identity and nearly 100% coverage of the top 10 sub-reads (with sequence length > 30 kb) using BLASR  
523 version 1.3.1<sup>60</sup> (Table S3a). The BUSCO v3.0.2 program<sup>59</sup> was run against the Actinopterygii dataset  
524 (4,454 conserved protein models) ([https://busco.ezlab.org/frame\\_wget.html](https://busco.ezlab.org/frame_wget.html)) with the default parameters,  
525 resulting in 97.16% complete BUSCOs (Table S3b). For gene region completeness assessment, more than  
526 99.46% of the unigenes *de novo* assembled from the transcriptome of intestines, middle kidney, head  
527 kidney, muscle, heart, and eggs had best hits on single contigs (Tables S3c and S3d). To assess the quality  
528 of the assembly, the interaction matrix of each chromosome was visualized with a heatmap at a 100 kb  
529 resolution.

530

### 531 **Repeat sequence analyses**

532 A combination of *ab initio* and homology-based strategies was used for repeat content annotation in the  
533 golden pompano genome. The *ab initio* repeat annotation was carried out by successively using  
534 RepeatModeler (version 1.0.5) (<http://www.repeatmasker.org/RepeatModeler/>) and RepeatMasker  
535 (version 3.3.0). The golden pompano repeat library was constructed by RepeatModeler, including two  
536 complementary programs, RECON and RepeatScout<sup>61</sup>. LTR-FINDER<sup>62</sup>, MITE-hunter<sup>63</sup>, and PILER-DF  
537 <sup>64</sup> were also used for *ab initio* prediction. To obtain the intact LTR consensus sequences, we integrated the  
538 LTR-FINDER results and removed false positives from the initial predictions by the LTR\_retriever  
539 pipeline<sup>65</sup>. The yielded consensus sequences were manually checked by aligning to the Repbase  
540 transposable element library (version 16.0) The pompano repeat library consisted of 1,252 consensus  
541 sequences and their classification information, which was used to run RepeatMasker on the assembled  
542 scaffolds. The combination of results from different *ab initio* tools was used to construct a new repetitive  
543 sequence database. This database was then merged with the Repbase known transposable element library  
544 (version 16.0)<sup>66</sup> and classified into different categories by the PASTEClassifier.py<sup>67</sup> script included in  
545 REPET v2.5<sup>68</sup>. The pompano repeat library was used to run RepeatMasker<sup>69</sup> on the golden pompano  
546 genome. Approximately 22.46% repeat elements (~145.11 Mb sequence length) were annotated for the

547 golden pompano ([Table S4](#)).

548

### 549 **Identification of non-coding RNA genes**

550 Different types of non-coding RNA in the golden pompano genome were identified and classified to family  
551 and subfamily. The tRNAscan-SE (version 1.23)<sup>70</sup> was applied to detect reliable tRNAs in the golden  
552 pompano genome. The miRNAs were identified by homology searches taking the miRBase (Release 21)<sup>71</sup>  
553 as a reference, with one mismatch allowed. Then, secondary structures of the putative sequences were  
554 predicted by miRDeep2<sup>72</sup>. Finally, putative miRNAs with hairpin structure were considered as confident.  
555 We adopted the homology strategy to inspect other types of non-coding RNA by comparing the secondary  
556 structure similarity using Infernal (e value  $\leq 0.01$ )<sup>73</sup> based on the Rfam database (release 12.0)<sup>74</sup>. In total,  
557 six types of ncRNA were identified, namely, tRNAs: transfer RNAs, rRNA: ribosome RNA, miRNAs:  
558 microRNAs, sRNA: small RNA, snRNAs: small nuclear and small nucleolar RNAs, and lncRNA: long  
559 non-coding RNA. Meanwhile, 1,274 ncRNAs with a total length of 128,846 bp for the female were  
560 identified in the golden pompano genome ([Table S5](#))

561

### 562 **Protein coding genes annotation**

563 A combination of homology-based, *de novo* gene prediction and RNA-seq data strategies was adopted for  
564 gene prediction. All of the predicted gene structures were integrated into weighted consensus gene  
565 structures using EvidenceModeler (EVM, version 1.1.1)<sup>75</sup>. Teleost proteins of three high-quality  
566 annotation collections were obtained from the NCBI database (*Larimichthys crocea*: assembly  
567 L\_crocea\_2.0, ASM74293v1; *Danio rerio*: Zv9 assembly, GCA\_000002035.2; *Notothenia coriiceps*:  
568 assembly NC01) and used to perform homology-based prediction. Then, we used GeMoMa (version  
569 1.3.1)<sup>76</sup> to predict the corresponding gene structure. For *de novo* prediction, we used Augustus (version  
570 2.4) with parameters trained by unigenes from transcriptome data of golden pompano pooled tissues.  
571 Regarding the third approach, unigenes were aligned to the genome assembly using BLAST (identity  $\geq$   
572 0.95, coverage  $\geq 0.90$ ) and then filtered using PASA v2.0.4 (<http://pasapipeline.github.io/>). Taking into



573 account the weights of the three methods, all of the predicted gene structures were integrated into  
574 consensus gene structures using EVIDENCEModeler (EVM)<sup>75</sup>. We also mapped pooled transcriptome data  
575 to the reference genome using TopHat<sup>77</sup> and assembled transcripts with Cufflinks<sup>77</sup>. Transdecoder<sup>78</sup> was  
576 then applied to identify the structures of new gene models and new transcripts derived from Cufflinks. To  
577 obtain high-confidence gene models, the gene set was filtered by the following steps: 1) CDS lengths  
578 shorter than 300bp were removed; 2) the CDS whose lengths were not triplets were deleted; and 3) gene  
579 models with stop codons occurring in the CDS region were filtered. Finally, 24,186 protein-coding genes  
580 of the female genome were annotated for the golden pompano, a number that is comparable to the 25,497  
581 genes of the zebrafish (Table S6a). Gene models were annotated by homology alignments against several  
582 databases using BLASTP from the BLAST+ package<sup>20</sup> (E-value = 1e-5)<sup>79</sup>, including nr, nt, Swissprot,  
583 and TrEMBL. InterProScan (v4.3) was used to collect domain information and GO terms annotation for  
584 the gene models. Meanwhile, KAAS (KEGG Automatic Annotation Server) was used for the KEGG  
585 pathway annotation. In total, 22,243 genes for the male and female could be assigned to a specific function,  
586 accounting for 97.48% of the male and female whole gene set (Table S6b).

587

### 588 **Pseudogenes prediction**

589 We carried out a whole-genome search to identify pseudogenes in the golden pompano. Only candidate  
590 pseudogenes with frameshift and/or premature stop codon occurrence were considered in the study.  
591 Proteins of zebrafish, large yellow croaker, and golden pompano were aligned to the golden pompano  
592 reference genome using GenBlastA (version 1.0.4)<sup>80</sup> for candidate homology region identification. The  
593 candidate pseudogenes were distinguished via genewise v2.4.1<sup>81</sup> with frameshift and/or premature stop  
594 codon occurrence in the coding region. After redundant filtering and manual inspection, a total of 151  
595 confident pseudogenes were found for the golden pompano (Table S5).

596

### 597 **Transcription factor (TF) identification**

598 The TFs in *T. ovatus* and other fishes were predicted using two methods, homology-based prediction and

599 conserved domain identification. Briefly, GeMoMa v1.3.1<sup>76</sup> was used to perform homology-based  
600 prediction with the TFs of zebrafish as a reference. The sequence similarity of TFs between zebrafish and  
601 *T. ovatus* was analyzed using BLASTP with parameter e-value =1e-5. The homologs with query coverage  
602 < 0.8 or target coverage < 0.8 were removed. Next, all of the predicted genes from the genome were used  
603 to annotate the domain using the hmmscan module of hmmer v3.0<sup>82</sup> against the database PFAM v 27.0<sup>83</sup>.  
604 Genes with conserved domains of zebrafish TFs were retained as candidate TFs. Lastly, we combined the  
605 result of the above-mentioned TF identification method to generate 1,364 TFs within 45 families on the  
606 female genome (Table S17).

607

### 608 **WGD events**

609 The all-to-all BLASTP program was used to identify homologous pairs, and syntenic blocks were  
610 recognized using MCscanX<sup>84</sup> with parameters E\_VALUE=1e-05, MAX GAPS=25. and MATCH\_SIZE=5  
611 in *S. salar*, *T. ovatus*, *M. miiuy*, *O. mossambicus*, *S. salar*, *D. rerio*, and *L. oculatus*. Synonymous  
612 substitution rates (Ks) of ohnolog pairs were calculated using codeml in the PAML package v4.7b<sup>85</sup>. The  
613 Ks peaks of ohnologs represent recent and ancient WGDs, and the Ks peaks of orthologs indicate  
614 speciation events. Ks ≤ 0.05 of gene pairs within *S. salar* were assigned to the Salmonid-specific WGD  
615 (Ss4R) event, while Ks > 0.05 were assigned to the teleost specific WGD (Ts3R) event. The mutation rate  
616 was 1.5e-8 substitutions per site per year. The formula  $t = \text{peak Ks}/2r$  was used to estimate the occurrence  
617 time of whole-genome duplication events, where t is time, Ks is the peak value of the substitution rate,  
618 and r is the neutral substitution rate (r = 1.5e-8).

619

### 620 **Phylogenetic tree construction and diverge time estimation**

621 The longest transcript was chosen to represent the gene. To define gene families that descended from a  
622 single gene in the most recent common ancestor, OrthoMCL (version 2.0.9; mcl inflation factor 1.5)<sup>86</sup>  
623 methodology was used to cluster gene families. We downloaded the protein-coding sequences of *Danio*  
624 *rerio* (Zv9 assembly, GCA\_000002035.2), *Larimichthys crocea* (assembly L\_crocea\_2.0), *Lepisosteus*

625 *oculatus* (GCA\_000242695.1), *Miichthys miiuy* (GCA\_001593715.1), Nile Tilapia (GCF\_001858045.2),  
626 *Notothenia coriicep* (GCA\_000735185.1 NC01), *Oncorhynchus mykiss* (GCF\_002163495.1), *Salmo*  
627 *salar* (GCF\_000233375.1), *Thunnus orientalis* (GCA\_000418415.1), and *Seriola dumerili*  
628 (GCF\_002260705.1) from the Ensemble database (release 56) and NCBI. A total of 1,447 single-copy  
629 orthologs shared by 11 species were obtained through gene family clustering using OrthoMCL v2.0.9.  
630 The protein sequences of single-copy orthologs were aligned by MUSCLE v3.8.31<sup>87</sup> and concatenated  
631 into a super-gene sequence. We then constructed a phylogenetic tree using the maximum likelihood (ML)  
632 algorithm with the JTT amino acid substitution model implemented in phyML software<sup>88</sup>. The divergence  
633 time was estimated using the MCMCtree program in the PAML v4.7b (Phylogenetic Analysis of ML)  
634 package. Five calibration points (*S. salar* vs. *O. mykiss*: 28.10-28.40 MYA, *T. ovatus* vs. *S. dumerili*: 57-  
635 63 MYA, *M. miiuy* vs. *L. crocea*: 81-101 MYA, *T. orientalis* vs. *S. dumerili*: 117-128 MYA, and *L.*  
636 *oculatus* vs. *S. dumerili*: 305-360 MYA) derived from the TimeTree database (<http://www.timetree.org/>)  
637 were applied to constrain the divergence times of the nodes.

638

### 639 **Gene family expansion/contraction analysis**

640 We applied the likelihood model implemented in the CAFE v2.2<sup>89</sup> package to identify the expanded and  
641 contracted gene families along each branch of the phylogenetic tree. The topology and branch lengths of  
642 the phylogenetic tree were taken to infer the significance of changes in gene family size. The significant  
643 levels of expansion and contraction were set at 0.05.

644

### 645 **Fish materials and F<sub>1</sub> mapping population construction**

646 Both parents used in this study were selected from 26 healthy and non-deficit golden pompano at sexual  
647 maturity (5–7 years old, 8–13 kg weight) from Nanao Town, Dapeng District, Shenzhen City, Guangdong  
648 Province, China. After intensive cultivation, all these golden pompanos were used as broodstocks for  
649 family construction. Before marking and spawning induction, the broodstocks were exercised twice a day

650 for 2–3 days to increase their abilities to adapt to environmental changes and reduce subsequent operation  
651 stress responses. Brightly colored and easily distinguishable ring tags were chosen and fixed on the tail  
652 stalk of the golden pompano. HCG (500–1000 U/kg) and LRH-A2 or LRH-A3 (2–7 $\mu$ g/kg) were injected  
653 into the dorsal muscle or caudal stalk muscle of the broodstocks. When the males were chasing the females,  
654 the colored ring logs in the tails of the females were recorded. The tail-chasing broodstock pair were  
655 carefully picked up and put into a separate cage or pool. Some immature golden pompano were put into  
656 the cage or pool to form a pair-mating environment. Twelve to twenty-four hours after the spawning, the  
657 floating fertilized eggs of each broodstock pair were carefully washed and removed into an incubation  
658 bucket (22–32°C) with sufficient oxygen (4 mg/L) until the fertilized eggs hatched (intensity less than 0.6  
659 million eggs per m<sup>3</sup>). All of the hatched offspring were cultured in marine (salinity 25–35‰) aquaculture  
660 ponds as an F<sub>1</sub> hybrid population (> 2000) of each broodstock pair. Samples from pairs of parents with  
661 the largest size/weight difference were selected to perform the genetic map construction and QTL mapping.  
662 The appearance data of the F<sub>1</sub> population are shown in [Fig 3A](#). The rearing of larvae and adults was  
663 performed according to standard protocols.

664

### 665 **Phenotype recording**

666 Two broodstock pairs were successfully mated, and one of their offspring was selected to carry out the  
667 subsequent experiments. A total of 200 six-month-old progeny from this F<sub>1</sub> population were randomly  
668 selected and numbered, and their total length (TL), body length (BL), body height (BH), and body width  
669 (BW) at three time points one month apart were separately measured and recorded. The dorsal muscle or  
670 caudal stalk muscle of each progeny was harvested and stored at -80°C. Phenotypic data for all growth  
671 traits were analyzed using GraphPad Prism 7.0 (GraphPad Software, San Diego, CA) software. Statistical  
672 evaluation was carried out by using Student's t tests, ANOVA, or  $\chi^2$  tests as appropriate. Statistical

673 significance was set at  $p < 0.05$ .

674

### 675 **DNA extraction and whole-genome resequencing**

676 Dorsal muscle from the parents and their 200 progeny (from Nanao Town, Dapeng District, Shenzhen  
677 City, Guangdong Province, China) and 147 three- to five-month-old fish from a natural population (from  
678 a clean and pollution-free offshore marine aquaculture farm in Bailong Town, Fangcheng City, Guangxi  
679 Province, China) were used to extract genomic DNA. The DNA was extracted using the Blood & Cell  
680 Culture DNA Mini Kit (Qiagen) kit according to the manufacturer's protocol. The concentration and  
681 quality of the total genomic DNA were determined by using 1% agarose gel electrophoresis and an ND-  
682 1000 Spectrophotometer (NanoDrop, USA). DNA samples were dissolved in ddH<sub>2</sub>O and stored at -80°C  
683 until use. Illumina sequencing DNA libraries were constructed according to the manufacturer's  
684 specifications (Illumina, CA, USA). Briefly, Covaris S220 (Covaris, MA, USA) was used to shear the  
685 genomic DNA into approximately 350 bp fragments. Then, fragments were end repaired with an additional  
686 base A and sequencing adapter. Finally, target fragment selection and PCR enrichment were performed,  
687 and clustering was generated with Cbot. An Illumina HiSeq Xten platform (Illumina, San Diego, CA,  
688 USA) was used to perform paired-end 100 bp sequencing in two lanes. Raw reads were filtered as follows:  
689 the adapter sequence was removed, and low-quality reads (the number of bases with a quality value  $Q \leq$   
690 10 accounting for more than 50% of the entire read) were deleted. If the proportion of N (the specific base  
691 type could not be determined) on a read was greater than 10%, the paired-end reads were filtered out.  
692 Finally, 8.3Gb (female parent), 8.6Gb (male parent), and 203.38Gb (200 offspring) of high-quality clean  
693 data were obtained for subsequent analyses.

694

### 695 **SNP calling and genotyping**

696 Raw data obtained by Illumina sequencing were filtered to obtain clean data. The data filtering criteria  
697 were as follows: the adapter sequences were removed, and the paired-end reads were deleted if the  
698 proportion of N on a read (the specific base type could be determined) was greater than 10%. Low-quality  
699 reads (the number of bases with a quality value  $Q \leq 10$  accounting for more than 50% of the entire read)  
700 were removed. Then, the clean reads were mapped onto the golden pompano reference genome, which  
701 was sequenced by our research group (deposited at DDBJ/ENA/GenBank under the accession  
702 WOFJ000000000 under BioProject PRJNA574895) using the Burrows-Wheeler Alignment tool<sup>57</sup>. The  
703 duplicated reads caused by PCR amplification were eliminated by the Mark Duplicate function of the  
704 Picard program (<http://sourceforge.net/projects/picard/>). The Genome Analysis Toolkit software  
705 (GATK)<sup>90</sup> was used to call SNPs and insertions and deletions (InDels) between the reference genome and  
706 all sequenced samples. In order to ensure a high quality SNP dataset, SNPs were filtered as follows: two  
707 SNPs with 5bp were discarded ; a SNP within 5bp near an InDel was filtered out; two InDels at distances  
708 less than 10bp were discarded<sup>91</sup>. The Circos<sup>15</sup> program was used to present the SNP and InDel data  
709 annotated with SnpEff<sup>92</sup>. SNPs screening between parents and genotyping of F<sub>1</sub> offspring were carried out  
710 based on the above-obtained SNP dataset. The SNP screening was performed as follows: SNPs with less  
711 than four-fold depth were deleted; SNPs on unanchored contigs or scaffolds were discarded; the  
712 homozygous SNPs in parents were also discarded. Genotyping of the F<sub>1</sub> population was performed  
713 according to the parental SNPs. The filtered SNP markers were divided into linkage groups (LGs) based  
714 on their locations in the reference genome, and the linkage relationships between markers on each  
715 chromosome were tested by two-points analysis. The missing genotyping imputation and the genotyping  
716 errors were corrected by SMOOTH<sup>15,93</sup>.

717

## 718 **Genetic linkage map construction**

719 After completing the mark filling and correction, Bin division was carried out according to the  
720 recombination and exchange of the offspring. All of the genotypes of F<sub>1</sub> individuals were arranged  
721 according to the physical positions on the chromosomes. A genotyping transition in any sample was  
722 considered as a recombination breakpoint. The SNP between the recombination breakpoints was classified  
723 as a bin<sup>94</sup>, and non-recombination events could be observed in a bin. The bin was used as a mapping  
724 marker to construct a genetic map. A final group of bin markers was applied to construct a linkage map  
725 using HighMap software<sup>95</sup>. Genetic distances were calculated using the Kosambi mapping function<sup>96</sup>. The  
726 heatmap of adjacent markers and the degree of collinearity between the genetic map and the reference  
727 genome (Spearman correlation coefficients) were used to evaluate the quality of the genetic linkage map.

728

### 729 **QTL mapping and fine positioning**

730 Combining the golden pompano phenotypic data and high-density genetic linkage map, the interval  
731 mapping (IM) in R/qtl was used for QTL mapping using a threshold LOD score of 3.0<sup>97</sup>. In order to verify  
732 the QTL loci, 10 KASP markers were explored based on the SNPs within the QTL loci. Genotyping was  
733 carried out in 64 individuals with evenly distributed extreme phenotypes in the F<sub>1</sub> population, which had  
734 no shared samples with the QTL mapping population, and the correlation between markers and phenotypes  
735 was confirmed by using Wilcoxon tests. In order to finely locate the main effect QTLs, we developed 14  
736 KASP markers in the bin marker of the above-confirmed QTL. A total of 147 individuals in a natural  
737 population were randomly selected and genotyped, and their total length (TL), body length (BL), body  
738 height (BH), and body width (BW) at two time points with two months apart were separately measured  
739 and recorded. After genotyping of the 147 natural population individuals, the correlations between the SNP  
740 HapQTL<sup>98</sup> and the phenotypes were measured by using target-fragment sanger sequencing and the T-test  
741 method. The mapping interval was determined according to the SNP position of the finely positioned SNP

742 marker among the bin markers on the reference genome. Non-synonymous mutations and mutations in  
743 the promoter region of the gene (within 2Kb upstream of the start codon) in the mapping interval were  
744 regarded as potential casual mutations. The related genes in the mapping interval with potential casual  
745 mutations were then annotated by blasting the Gene Ontology (GO)<sup>99</sup> and Kyoto Encyclopedia of Genes  
746 and Genomes (KEGG)<sup>100</sup> databases. The genes related to growth in the annotation results were considered  
747 as candidate genes that need to be verified. Candidate genes are listed in [Table S23](#). SNP validation of the  
748 candidate gene *gpsstr1* was performed by sanger sequencing. Simply, muscle samples were collected from  
749 64 F<sub>1</sub> population and 147 natural populations. The gDNA was extracted by the identical method in “DNA  
750 extraction and whole-genome resequencing” section. Then the PCR was performed to amplify the 2000  
751 bp length fragment of the promotor region of *gpsstr1* gene. PCR products were purified and sequenced by  
752 sanger sequencing method. (See [Table S24](#) for PCR primers for sanger sequencing).

753

#### 754 **Quantification of candidate genes in the F<sub>1</sub> and natural populations**

755 The cDNA of the candidate gene *gpsstr1* was quantified by qPCR amplifications.. Briefly, muscle samples  
756 were collected from 200 F<sub>1</sub> progeny and 147 individuals from the natural population. Total RNAs were  
757 then extracted from muscles in Trizol (Roche) reagent according to the manufacturer's instructions. RNAs  
758 were reverse transcribed by using the PrimeScript RT reagent Kit with gDNA Eraser (TAKARA, Kyoto,  
759 Japan). Quantification of candidate genes was conducted in triplicate by using Bio-rad iQ SYBR Green  
760 Supermix (Bio-rad, Hercules, CA, USA). Relative gene quantification was calculated according to the  
761 comparative threshold cycle method ( $2^{-\Delta\Delta C_t}$ ) with the 18S gene as a control. (see [Table S26](#) for *gpsstr1*  
762 primers).

763

#### 764 **Zebrafish maintenance and microinjection**



765 All of the wild-type AB strain zebrafish were raised at 28-28.5°C on a 14 h light/10 h dark cycle at  
766 Shanghai Model Organisms Center, Inc, which is accredited by the Association for Assessment and  
767 Accreditation of Laboratory Animal Care (AAALAC) International. After natural mating, the obtained  
768 embryos were maintained at 28.5°C in 0.2% deionized instant ocean salt water and staged based on  
769 previous research<sup>101</sup>. All morpholinos (MOs) were designed and synthesized by Gene Tools, LLC  
770 (<http://www.gene-tools.com/>). Antisense MOs were microinjected into fertilized one-cell stage embryos  
771 according to the standard protocols<sup>102</sup>. For *sstr1a* knockdown, the sequence of the *sstr1a* translation-  
772 blocking was 5'- AAGGTGTCGTTGGGCAGCATTC -3' (ATG-MO). The sequence for the standard  
773 control MO was 5'- CCTCTTACCTCAGTTACAATTTATA -3' (Gene Tools). The amounts of the MOs  
774 used for microinjection were as follows: Control-MO and ATG-MO, 4 ng per embryo. The CDS region  
775 of *sstr1a* cDNA, including the *sstr1a*-ATG-MO target sequence, was cloned in the frame into pcDNA3.1-  
776 EGFP for testing the effectiveness of *sstr1a* MOs. For *gsk3β* knockdown, the sequence of the *gsk3ba*  
777 splice-blocking morpholino was 5'- CTGTCTCGGTCTTACCTTAAATCGC -3' (E2I2-MO). The  
778 sequence for the standard control morpholino was 5'- CCTCTTACCTCAGTTACAATTTATA -3' (Gene  
779 Tools). The amount of the MOs used for injection was as follows: Control-MO and E2I2-MO, 4 ng per  
780 embryo. Primers spanning *gsk3ba* exon 1 (forward primer: 5'- TTCGGCAGCATGAAAGTC -3') and  
781 exon 4 (reverse primer: 5'- TAGTGTCTTGCCACTCTGTA -3') were used for RT-PCR analysis for  
782 confirmation of the efficacy of the E2I2-MO. The primer *ef1a* sequences used as the internal control were  
783 5'- GGAAATTCGAGACCAGCAAATAC -3' (forward) and 5'- GATACCAGCCTCAAACCTCACC -3'  
784 (reverse). At 2-dpf, embryos were dechorionated and anesthetized with 0.016% MS-222 (tricaine methane  
785 sulfonate, Sigma-Aldrich, St. Louis, MO). Zebrafish were then oriented on lateral side (anterior, left;  
786 posterior, right; dorsal, top) or dorsal side, and mounted with 3% methylcellulose in a depression slide for  
787 observation by light or fluorescence microscopy. The phenotypes of body lengths, tail, and eyes were

788 analyzed.

789

## 790 **Gene silencing**

791 The siRNA probes were designed and synthesized according to the human *sstr1* gene (NM\_001049.3).

792 The probes are listed in [Table S26](#). The 293T cells (ATCC, Manassas, Virginia, USA) were cultured in

793 DMEM (Hyclone, USA) with 5% FBS (Gibco BRL, Co. Ltd.) and 1% penicillin-streptomycin (Sangon

794 Biotech, China.) at 37°C in a 5% CO<sub>2</sub> incubator. Three experimental groups, 293T, 293T+si-*sstr1* NC,

795 and 293T +si-*sstr1* were set. Thirty picomoles of si-*sstr1* per well were transferred into 293T cells in 24-

796 well plates (Corning-Costa) by using 9 µl Lipofectamine RNAi MAX Reagent (Invitrogen, USA). Cells

797 were centrifuged and collected for protein extraction after 12-24h incubation.

798

## 799 **RNA-seq**

800 Zebrafish embryos injected with *sstr1a* MO and control MO at 2 dpf were collected for RNA-seq analysis.

801 Total RNAs were extracted and purified using an RNAqueous Total RNA isolation kit (Cat. No. AM1912,

802 Thermo Fisher). DNA contamination was eliminated by DNase digestion. The quality and quantity of

803 RNA were determined by using an Agilent 2100 BioAnalyzer (Agilent Technologies, Santa Clara, CA).

804 Transcriptome libraries were prepared with a TruSeq RNA library Prep kit v2 (Cat. No. RS-122-2001,

805 Illumina) according to the manufacturer's protocol and sequenced at the CCHMC Core Facility using

806 Illumina HiSeq 2500 sequencing system (Illumina) to generate 100 bp paired-end reads. Fastqc

807 [<http://www.bioinformatics.babraham.ac.uk/projects/fastqc/>] and trimmomatic

808 [<http://www.usadellab.org/cms/?page=trimmomatic>] were applied to check the quality of the reads and to

809 filter the low-quality reads. The clean reads were mapped to the latest Zebrafish genome assembly

810 GRCz10 at default thresholds by using RSEM [<http://deweylab.github.io/RSEM/>]. TopHat v2.0.9 and

811 Cufflinks were used to identify the mRNA levels, which were normalized by the Fragments Per Kilobase  
812 of exon model per Million mapped reads (FPKM). Differential expression of genes was analyzed by using  
813 CSBB's [<https://github.com/skygenomics/CSBB-v1.0>]. ToppGene [<https://topgene.cchmc.org/>] was used  
814 to perform GO annotation and KEGG pathway annotation.

815

### 816 **Quantitative real-time PCR**

817 Total RNA was extracted from golden pompano tissues or embryos or zebrafish embryos in Trizol (Roche)  
818 according to the manufacturer's instructions. RNAs were reverse transcribed by using the PrimeScript RT  
819 reagent Kit with gDNA Eraser (Takara). Expression of each gene was examined in triplicate by using Bio-  
820 rad iQ SYBR Green Supermix (Bio-rad) with detection on the Realplex system (Eppendorf). Relative gene  
821 quantification was based on the comparative threshold cycle method ( $2^{-\Delta\Delta C_t}$ ) by using the *efla* gene as a  
822 control. All of the primers are listed in [Table S26](#).

823

### 824 **Western blotting assays**

825 Muscles from fast/slow growing golden pompano, zebrafish tissues from *sstr1a* knockdown and control  
826 group, or 293T cells in the *sstr1* silenced group and control were treated with 1 mL of tissue lysate (150  
827 mmol/L NaCl, 50 mmol/L Tris, 0.1% SDS, 5 mmol/L EDTA, 5  $\mu$ g/mL aprotinin, 1% NP-40, and 2  
828 mmol/L PMSF followed by lysis with protein lysate at 4°C for 30 min). All of the samples were  
829 centrifuged at 12,000 r/min at 4°C for 30 min, and the supernatant was collected to detect the protein  
830 concentration by using a BCA kit (CW BIO. Co., Ltd., Shanghai, China). All of the samples were resolved  
831 by SDS-PAGE using a NuPAGE 4–12% gel (Life Technologies). All of the proteins were transferred onto  
832 a nitrocellulose filter (BioRad, Hercules, CA, USA) and sealed by 5% dried skimmed milk at 4°C  
833 overnight. The membranes were incubated with diluted primary rabbit polyclonal to Somatostatin

834 Receptor 1/SSTR1 (ab140945, Abcam, UK) (1:1000), IGF1(DF8564, Affinity, Biosciences. OH. USA)  
835 (1:1000), DKK1 (ab61275, Abcam, UK) (1:1000), GSK3 (alpha+beta) (ab68476, Abcam, UK) (1:1000),  
836 WNT9A (PA5-47464, Invitrogen, USA) (1:1000),  $\beta$ -Catenin (GTX61089, Genetex, USA) (1:1000),  
837 AXIN2 (DF6978, Affinity, Biosciences. OH. USA) (1:1000), and GAPDH (ab8245, Abcam, UK) (1:1000)  
838 antibodies overnight at 4°C. The membranes were treated with IgG-HRP secondary antibody (1: 2000,  
839 CWBiotech., Ltd., Beijing, China) and incubated at 37°C for 2 h. The membrane was soaked in an  
840 enhanced chemiluminescence (ECL) kit (CW Biotech., Ltd., Beijing, China) according to the  
841 manufacturer's instructions.

842

### 843 **Statistical analysis**

844 All data are presented as mean  $\pm$  SEM. Statistical analysis and graphical representation of the data were  
845 performed using GraphPad Prism 7.0 (GraphPad Software, San Diego, CA). Statistical evaluation was  
846 performed by using a Student's t test, ANOVA, or  $\chi^2$  test as appropriate. *p* value of less than 0.05 was  
847 considered statistically significant. Statistical significance is indicated by \* or *p* value. \* represents *p* <  
848 0.05, \*\*represents *p* < 0.01, and \*\*\* indicates *p* < 0.0001. The results are representative of at least three  
849 independent experiments.

850

### 851 **Acknowledgements**

852 We thank Mr Zhuanbin Wu for zebrafish analysis advices and technical consults.

853

### 854 **Sources of Funding**

855 This research was supported by the Guangxi science and technology major project (GuiKeAA18242031,  
856 GuiKeAA18242031-2, GuiKeAA17204080, GuiKe AA17204080-3), Guangxi Key Laboratory for

857 Aquatic Genetic Breeding and Healthy Aquaculture, Guangxi Institute of Fishery Sciences (14-045-10  
858 (14-A-01-02),15-140-23(15-A-01-01, 15-A-01-02, 15-A-01-03),16-380-38(16-A-01-01, 16-A-01-02),  
859 17-A-01-02 and 19-A-01-05) and Guangxi research institutes of basic research and public service special  
860 operations (GXIF-2016-03, GXIF-2016-09, GXIF-2016-18, GXIF-2016-19).

861

## 862 **Author contributions**

863 H.L.L and X.H.C designed the scientific objectives and oversaw the project. H.L.L., X.H.C., Y.Z.Z.,  
864 J.X.P., and Y.L discussed the primary ideas of the article. Y.D.Z, J.X.P., Y.L., Y.H., Q.Y.L., P.P.H.,  
865 C.L.Y., P.Y.W., X.L.C., and P.F.F. collected samples for sequencing DNA and RNA. C.M.J. and their  
866 colleagues performed genome sequencing, assembly and annotation. C.M.J. and H.Y.Y performed  
867 phylogenomic and whole genome duplication evolution analysis. Y.H.X, H.L.L and Y.D.Z analyzed the  
868 QTL mapping and fine mapping and candidate screening. C.M.J. H.Y.Y., H.L.L., and Y.D.Z performed  
869 RNA-seq analysis. H.L.L and Y.D.Z performed functional assay of zebrafish *sstr1a* gene. C.M.J, H.Y.Y.,  
870 H.L.L., Y.H.X., and Y.D.Z prepared the supplemental data and method. C.M.J., H.L.L and Y.H.X prepared  
871 the draft manuscript with input from all other authors. H.L.L., X.H.C., Y.L., Y.H.X and H.K.Z. discussed  
872 and revised the manuscript.

873

## 874 **Data availability**

875 The authors declare that all data reported in this study are fully and freely available from the date of  
876 publication. This Whole Genome Shotgun project has been deposited at DDBJ/ENA/GenBank under the  
877 accession WOFJ00000000. The version described in this paper is version WOFJ01000000. The draft  
878 genome data (genome assembling and annotations) and re-sequencing data are available under BioProject  
879 PRJNA574895.

880

## 881 **Disclosures**

882 The authors declare no competing financial interests.

883

## 884 **Supplemental material**

885 Supplemental Figures (Figure S1-S11)

886 Supplemental Tables (Table S1-S26)

887

## 888 **References**

889

- 890 1. Yue GH. Recent advances of genome mapping and marker-assisted selection in aquaculture. *Fish Fish* **15**,  
891 376–396 (2013).
- 892 2. Mackay TF. The genetic architecture of quantitative traits. *Annu Rev Genet* **35**, 303–339 (2001).
- 893 3. Feng X, *et al.* A high-resolution genetic linkage map and QTL fine mapping for growth-related traits and sex  
894 in the Yangtze River common carp (*Cyprinus carpio haematopterus*). *BMC Genomics* **19**, 230 (2018).
- 895 4. Song J, Li Q, Yu Y, Wan S, Han L, Du S. Mapping Genetic Loci for Quantitative Traits of Golden Shell Color,  
896 Mineral Element Contents, and Growth-Related Traits in Pacific Oyster (*Crassostrea gigas*). *Mar Biotechnol*  
897 (*NY*) **20**, 666–675 (2018).
- 898 5. Lv W, Zheng X, Kuang Y, Cao D, Yan Y, Sun X. QTL variations for growth-related traits in eight distinct  
899 families of common carp (*Cyprinus carpio*). *BMC Genet* **17**, 65 (2016).
- 900 6. Fu B, Liu H, Yu X, Tong J. A high-density genetic map and growth related QTL mapping in bighead carp  
901 (*Hypophthalmichthys nobilis*). *Sci Rep* **6**, 28679 (2016).
- 902 7. Wang L, *et al.* Construction of a high-density linkage map and fine mapping of QTL for growth in Asian  
903 seabass. *Sci Rep* **5**, 16358 (2015).
- 904 8. Slate J, Gratten J, Beraldi D, Stapley J, Hale M, Pemberton JM. Gene mapping in the wild with SNPs:  
905 guidelines and future directions. *Genetica* **136**, 97–107 (2009).
- 906 9. Wang S, Meyer E, McKay JK, Matz MV. 2b-RAD: a simple and flexible method for genome-wide genotyping.  
907 *Nat Methods* **9**, 808–810 (2012).
- 908 10. Zeng B, *et al.* Genome-wide association study of rust traits in orchardgrass using SLAF-seq technology.  
909 *Hereditas* **154**, 5 (2017).
- 910 11. Davey JW, Hohenlohe PA, Etter PD, Boone JQ, Catchen JM, Blaxter ML. Genome-wide genetic marker  
911 discovery and genotyping using next-generation sequencing. *Nat Rev Genet* **12**, 499–510 (2011).
- 912 12. Nelson JS. Fishes of the World. Third edition [M]. *New York: John Wiley&Sons, Inc.* (1994).
- 913 13. Zhu K, *et al.* Genomic structure, expression pattern and polymorphisms of GILT in golden pompano  
914 *Trachinotus ovatus* (Linnaeus 1758). *Gene* **665**, 18–25 (2018).
- 915 14. Cao Z, *et al.* MHC class IIalpha polymorphism and its association with resistance/susceptibility to *Vibrio*  
916 *harveyi* in golden pompano (*Trachinotus ovatus*). *Fish Shellfish Immunol* **80**, 302–310 (2018).
- 917 15. Krzywinski M, *et al.* Circos: an information aesthetic for comparative genomics. *Genome Res* **19**, 1639–1645  
918 (2009).
- 919 16. Crete-Lafreniere A, Weir LK, Bernatchez L. Framing the Salmonidae family phylogenetic portrait: a more

- 920 complete picture from increased taxon sampling. *PLoS One* **7**, e46662 (2012).
- 921 17. Cheng F, Mandakova T, Wu J, Xie Q, Lysak MA, Wang X. Deciphering the diploid ancestral genome of the  
922 Mesohexaploid *Brassica rapa*. *Plant Cell* **25**, 1541-1554 (2013).
- 923 18. Emery M, *et al.* Preferential retention of genes from one parental genome after polyploidy illustrates the  
924 nature and scope of the genomic conflicts induced by hybridization. *PLoS Genet* **14**, e1007267 (2018).
- 925 19. Liang Z, Schnable JC. Functional Divergence between Subgenomes and Gene Pairs after Whole Genome  
926 Duplications. *Mol Plant* **11**, 388-397 (2018).
- 927 20. Winata CL, Dodzian J, Bialek-Wyrzykowska U. The zebrafish as a model for developmental and biomedical  
928 research in Poland and beyond. *Dev Biol* **457**, 167-168 (2020).
- 929 21. Dai X, Zhang W, Zhuo Z, He J, Yin Z. Neuroendocrine regulation of somatic growth in fishes. *Sci China Life Sci*  
930 **58**, 137-147 (2015).
- 931 22. Hou ZS, *et al.* GHRH-SST-GH-IGF axis regulates crosstalk between growth and immunity in rainbow trout  
932 (*Oncorhynchus mykiss*) infected with *Vibrio anguillarum*. *Fish Shellfish Immunol* **106**, 887-897 (2020).
- 933 23. Ranke MB, Wit JM. Growth hormone - past, present and future. *Nat Rev Endocrinol* **14**, 285-300 (2018).
- 934 24. Clayton PE, Banerjee I, Murray PG, Renehan AG. Growth hormone, the insulin-like growth factor axis, insulin  
935 and cancer risk. *Nat Rev Endocrinol* **7**, 11-24 (2011).
- 936 25. Ruscica M, *et al.* Regulation of prostate cancer cell proliferation by somatostatin receptor activation. *Mol Cell*  
937 *Endocrinol* **315**, 254-262 (2010).
- 938 26. Bigiani A, *et al.* Functional correlates of somatostatin receptor 2 overexpression in the retina of mice with  
939 genetic deletion of somatostatin receptor 1. *Brain Res* **1025**, 177-185 (2004).
- 940 27. Gunther T, *et al.* International Union of Basic and Clinical Pharmacology. CV. Somatostatin Receptors:  
941 Structure, Function, Ligands, and New Nomenclature. *Pharmacol Rev* **70**, 763-835 (2018).
- 942 28. Pavan B, *et al.* Somatostatin coupling to adenylyl cyclase activity in the mouse retina. *Naunyn Schmiedebergs*  
943 *Arch Pharmacol* **370**, 91-98 (2004).
- 944 29. Casini G, *et al.* Altered morphology of rod bipolar cell axonal terminals in the retinas of mice carrying genetic  
945 deletion of somatostatin subtype receptor 1 or 2. *Eur J Neurosci* **19**, 43-54 (2004).
- 946 30. Lekven AC, Thorpe CJ, Waxman JS, Moon RT. Zebrafish *wnt8* encodes two *wnt8* proteins on a bicistronic  
947 transcript and is required for mesoderm and neurectoderm patterning. *Dev Cell* **1**, 103-114 (2001).
- 948 31. James RG, *et al.* Bruton's tyrosine kinase revealed as a negative regulator of Wnt-beta-catenin signaling. *Sci*  
949 *Signal* **2**, ra25 (2009).
- 950 32. Moriyama Y, Koshiba-Takeuchi K. Significance of whole-genome duplications on the emergence of  
951 evolutionary novelties. *Brief Funct Genomics* **17**, 329-338 (2018).
- 952 33. Jaillon O, *et al.* Genome duplication in the teleost fish *Tetraodon nigroviridis* reveals the early vertebrate  
953 proto-karyotype. *Nature* **431**, 946-957 (2004).
- 954 34. Brunet FG, *et al.* Gene loss and evolutionary rates following whole-genome duplication in teleost fishes. *Mol*  
955 *Biol Evol* **23**, 1808-1816 (2006).
- 956 35. Xie ZZ, *et al.* Nineteen polymorphic microsatellite markers developed for *Trachinotus ovatus*. *Genet Mol Res*  
957 **13**, 10518-10522 (2014).
- 958 36. Zhenzhen X, *et al.* Transcriptome analysis of the *Trachinotus ovatus*: identification of reproduction, growth  
959 and immune-related genes and microsatellite markers. *PLoS One* **9**, e109419 (2014).
- 960 37. Liu F, *et al.* A genome scan revealed significant associations of growth traits with a major QTL and GHR2 in  
961 tilapia. *Sci Rep* **4**, 7256 (2014).
- 962 38. Tao WJ, Boulding EG. Associations between single nucleotide polymorphisms in candidate genes and growth  
963 rate in Arctic charr (*Salvelinus alpinus* L.). *Heredity (Edinb)* **91**, 60-69 (2003).
- 964 39. Trainor BC, Hofmann HA. Somatostatin and somatostatin receptor gene expression in dominant and  
965 subordinate males of an African cichlid fish. *Behav Brain Res* **179**, 314-320 (2007).

- 966 40. Lanneau C, *et al.* Involvement of the Sst1 somatostatin receptor subtype in the intrahypothalamic neuronal  
967 network regulating growth hormone secretion: an in vitro and in vivo antisense study. *Endocrinology* **141**,  
968 967-979 (2000).
- 969 41. Ben-Shlomo A, Melmed S. Pituitary somatostatin receptor signaling. *Trends Endocrinol Metab* **21**, 123-133  
970 (2010).
- 971 42. Wang XP, *et al.* Alterations in glucose homeostasis in SSTR1 gene-ablated mice. *Mol Cell Endocrinol* **247**, 82-  
972 90 (2006).
- 973 43. Hagemeister AL, Kittilson JD, Bergan HE, Sheridan MA. Rainbow trout somatostatin receptor subtypes  
974 SSTR1A, SSTR1B, and SSTR2 differentially activate the extracellular signal-regulated kinase and  
975 phosphatidylinositol 3-kinase signaling pathways in transfected cells. *J Mol Endocrinol* **45**, 317-327 (2010).
- 976 44. Thermos K, Bagnoli P, Epelbaum J, Hoyer D. The somatostatin sst1 receptor: an autoreceptor for  
977 somatostatin in brain and retina? *Pharmacol Ther* **110**, 455-464 (2006).
- 978 45. Fang J, *et al.* Pathways involved in pony body size development. *BMC Genomics* **22**, 58 (2021).
- 979 46. Bejsovec A. Wingless/Wnt signaling in Drosophila: the pattern and the pathway. *Mol Reprod Dev* **80**, 882-  
980 894 (2013).
- 981 47. Jackson BM, Eisenmann DM. beta-catenin-dependent Wnt signaling in C. elegans: teaching an old dog a  
982 new trick. *Cold Spring Harb Perspect Biol* **4**, a007948 (2012).
- 983 48. Nusse R, Clevers H. Wnt/beta-Catenin Signaling, Disease, and Emerging Therapeutic Modalities. *Cell* **169**,  
984 985-999 (2017).
- 985 49. Wang J, Sinha T, Wynshaw-Boris A. Wnt signaling in mammalian development: lessons from mouse genetics.  
986 *Cold Spring Harb Perspect Biol* **4**, (2012).
- 987 50. Usami Y, Gunawardena AT, Iwamoto M, Enomoto-Iwamoto M. Wnt signaling in cartilage development and  
988 diseases: lessons from animal studies. *Lab Invest* **96**, 186-196 (2016).
- 989 51. Arnold CP, Benham-Pyle BW, Lange JJ, Wood CJ, Sanchez Alvarado A. Wnt and TGFbeta coordinate growth  
990 and patterning to regulate size-dependent behaviour. *Nature* **572**, 655-659 (2019).
- 991 52. Wang S, *et al.* Octreotide stimulates somatostatin receptor-induced apoptosis of SW480 colon cancer cells  
992 by activation of glycogen synthase kinase-3beta, A Wnt/beta-catenin pathway modulator.  
993 *Hepatology* **60**, 1639-1646 (2013).
- 994 53. Gnerre S, *et al.* High-quality draft assemblies of mammalian genomes from massively parallel sequence data.  
995 *Proc Natl Acad Sci U S A* **108**, 1513-1518 (2011).
- 996 54. Boetzer M, Henkel CV, Jansen HJ, Butler D, Pirovano W. Scaffolding pre-assembled contigs using SSPACE.  
997 *Bioinformatics* **27**, 578-579 (2011).
- 998 55. English AC, *et al.* Mind the gap: upgrading genomes with Pacific Biosciences RS long-read sequencing  
999 technology. *PLoS One* **7**, e47768 (2012).
- 1000 56. Burton JN, Adey A, Patwardhan RP, Qiu R, Kitzman JO, Shendure J. Chromosome-scale scaffolding of de  
1001 novo genome assemblies based on chromatin interactions. *Nat Biotechnol* **31**, 1119-1125 (2013).
- 1002 57. Li H, Durbin R. Fast and accurate short read alignment with Burrows-Wheeler transform. *Bioinformatics* **25**,  
1003 1754-1760 (2009).
- 1004 58. Servant N, *et al.* HiC-Pro: an optimized and flexible pipeline for Hi-C data processing. *Genome Biol* **16**, 259  
1005 (2015).
- 1006 59. Simao FA, Waterhouse RM, Ioannidis P, Kriventseva EV, Zdobnov EM. BUSCO: assessing genome assembly  
1007 and annotation completeness with single-copy orthologs. *Bioinformatics* **31**, 3210-3212 (2015).
- 1008 60. Chaisson MJ, Tesler G. Mapping single molecule sequencing reads using basic local alignment with  
1009 successive refinement (BLASR): application and theory. *BMC Bioinformatics* **13**, 238 (2012).
- 1010 61. Price AL, Jones NC, Pevzner PA. De novo identification of repeat families in large genomes. *Bioinformatics* **21**  
1011 **Suppl 1**, i351-358 (2005).



- 1012 62. Xu Z, Wang H. LTR\_FINDER: an efficient tool for the prediction of full-length LTR retrotransposons. *Nucleic*  
1013 *Acids Res* **35**, W265-268 (2007).
- 1014 63. Han Y, Wessler SR. MITE-Hunter: a program for discovering miniature inverted-repeat transposable elements  
1015 from genomic sequences. *Nucleic Acids Res* **38**, e199 (2010).
- 1016 64. Edgar RC, Myers EW. PILER: identification and classification of genomic repeats. *Bioinformatics* **21 Suppl 1**,  
1017 i152-158 (2005).
- 1018 65. Ou S, Jiang N. LTR\_retriever: A Highly Accurate and Sensitive Program for Identification of Long Terminal  
1019 Repeat Retrotransposons. *Plant Physiol* **176**, 1410-1422 (2018).
- 1020 66. Bao W, Kojima KK, Kohany O. Repbase Update, a database of repetitive elements in eukaryotic genomes.  
1021 *Mob DNA* **6**, 11 (2015).
- 1022 67. Hoede C, *et al*. PASTEC: an automatic transposable element classification tool. *PLoS One* **9**, e91929 (2014).
- 1023 68. Flutre T, Duprat E, Feuillet C, Quesneville H. Considering transposable element diversification in de novo  
1024 annotation approaches. *PLoS One* **6**, e16526 (2011).
- 1025 69. Chen N. Using RepeatMasker to identify repetitive elements in genomic sequences. *Curr Protoc*  
1026 *Bioinformatics* **Chapter 4**, Unit 4 10 (2004).
- 1027 70. Lowe TM, Chan PP. tRNAscan-SE On-line: integrating search and context for analysis of transfer RNA genes.  
1028 *Nucleic Acids Res* **44**, W54-57 (2016).
- 1029 71. Kozomara A, Griffiths-Jones S. miRBase: annotating high confidence microRNAs using deep sequencing data.  
1030 *Nucleic Acids Res* **42**, D68-73 (2014).
- 1031 72. Friedlander MR, Mackowiak SD, Li N, Chen W, Rajewsky N. miRDeep2 accurately identifies known and  
1032 hundreds of novel microRNA genes in seven animal clades. *Nucleic Acids Res* **40**, 37-52 (2012).
- 1033 73. Nawrocki EP, Eddy SR. Infernal 1.1: 100-fold faster RNA homology searches. *Bioinformatics* **29**, 2933-2935  
1034 (2013).
- 1035 74. Gardner PP, *et al*. Rfam: updates to the RNA families database. *Nucleic Acids Res* **37**, D136-140 (2009).
- 1036 75. Haas BJ, *et al*. Automated eukaryotic gene structure annotation using EvidenceModeler and the Program to  
1037 Assemble Spliced Alignments. *Genome Biol* **9**, R7 (2008).
- 1038 76. Keilwagen J, Wenk M, Erickson JL, Schattat MH, Grau J, Hartung F. Using intron position conservation for  
1039 homology-based gene prediction. *Nucleic Acids Res* **44**, e89 (2016).
- 1040 77. Trapnell C, *et al*. Differential gene and transcript expression analysis of RNA-seq experiments with TopHat  
1041 and Cufflinks. *Nat Protoc* **7**, 562-578 (2012).
- 1042 78. Grabherr MG, *et al*. Full-length transcriptome assembly from RNA-Seq data without a reference genome.  
1043 *Nat Biotechnol* **29**, 644-652 (2011).
- 1044 79. Camacho C, *et al*. BLAST+: architecture and applications. *BMC Bioinformatics* **10**, 421 (2009).
- 1045 80. She R, Chu JS, Wang K, Pei J, Chen N. GenBlastA: enabling BLAST to identify homologous gene sequences.  
1046 *Genome Res* **19**, 143-149 (2009).
- 1047 81. Birney E, Durbin R. Using GeneWise in the Drosophila annotation experiment. *Genome Res* **10**, 547-548  
1048 (2000).
- 1049 82. Eddy SR. Accelerated Profile HMM Searches. *PLoS Comput Biol* **7**, e1002195 (2011).
- 1050 83. Finn RD, *et al*. Pfam: clans, web tools and services. *Nucleic Acids Res* **34**, D247-251 (2006).
- 1051 84. Wang Y, *et al*. MCScanX: a toolkit for detection and evolutionary analysis of gene synteny and collinearity.  
1052 *Nucleic Acids Res* **40**, e49 (2012).
- 1053 85. Yang Z. PAML 4: phylogenetic analysis by maximum likelihood. *Mol Biol Evol* **24**, 1586-1591 (2007).
- 1054 86. Li L, Stoeckert CJ, Jr., Roos DS. OrthoMCL: identification of ortholog groups for eukaryotic genomes. *Genome*  
1055 *Res* **13**, 2178-2189 (2003).
- 1056 87. Edgar RC. MUSCLE: multiple sequence alignment with high accuracy and high throughput. *Nucleic Acids Res*  
1057 **32**, 1792-1797 (2004).

- 1058 88. Guindon S, Dufayard JF, Lefort V, Anisimova M, Hordijk W, Gascuel O. New algorithms and methods to  
1059 estimate maximum-likelihood phylogenies: assessing the performance of PhyML 3.0. *Syst Biol* **59**, 307-321  
1060 (2010).
- 1061 89. De Bie T, Cristianini N, Demuth JP, Hahn MW. CAFE: a computational tool for the study of gene family  
1062 evolution. *Bioinformatics* **22**, 1269-1271 (2006).
- 1063 90. McKenna A, *et al.* The Genome Analysis Toolkit: a MapReduce framework for analyzing next-generation DNA  
1064 sequencing data. *Genome Res* **20**, 1297-1303 (2010).
- 1065 91. Reumers J, *et al.* Optimized filtering reduces the error rate in detecting genomic variants by short-read  
1066 sequencing. *Nat Biotechnol* **30**, 61-68 (2011).
- 1067 92. Cingolani P, *et al.* A program for annotating and predicting the effects of single nucleotide polymorphisms,  
1068 SnpEff: SNPs in the genome of *Drosophila melanogaster* strain w1118; iso-2; iso-3. *Fly (Austin)* **6**, 80-92  
1069 (2012).
- 1070 93. Yang W, *et al.* ddRADseq-assisted construction of a high-density SNP genetic map and QTL fine mapping for  
1071 growth-related traits in the spotted scat (*Scatophagus argus*). *BMC Genomics* **21**, 278 (2020).
- 1072 94. Huang X, *et al.* High-throughput genotyping by whole-genome resequencing. *Genome Res* **19**, 1068-1076  
1073 (2009).
- 1074 95. Liu D, *et al.* Construction and analysis of high-density linkage map using high-throughput sequencing data.  
1075 *PLoS One* **9**, e98855 (2014).
- 1076 96. Kosambi DD. The estimation of map distances from recombination values. *Ann Eugen* **12**, 172-175 (1944).
- 1077 97. Arends D, Prins P, Jansen RC, Broman KW. R/qtl: high-throughput multiple QTL mapping. *Bioinformatics* **26**,  
1078 2990-2992 (2010).
- 1079 98. Xu H, Guan Y. Detecting local haplotype sharing and haplotype association. *Genetics* **197**, 823-838 (2014).
- 1080 99. Ashburner M, *et al.* Gene ontology: tool for the unification of biology. The Gene Ontology Consortium. *Nat*  
1081 *Genet* **25**, 25-29 (2000).
- 1082 100. Kanehisa M, Goto S. KEGG: kyoto encyclopedia of genes and genomes. *Nucleic Acids Res* **28**, 27-30 (2000).
- 1083 101. Kimmel CB, Ballard WW, Kimmel SR, Ullmann B, Schilling TF. Stages of embryonic development of the  
1084 zebrafish. *Dev Dyn* **203**, 253-310 (1995).
- 1085 102. Lawson ND, Weinstein BM. In vivo imaging of embryonic vascular development using transgenic zebrafish.  
1086 *Dev Biol* **248**, 307-318 (2002).
- 1087  
1088  
1089  
1090  
1091  
1092  
1093  
1094  
1095  
1096  
1097  
1098  
1099  
1100  
1101  
1102  
1103

1104 **Figures**

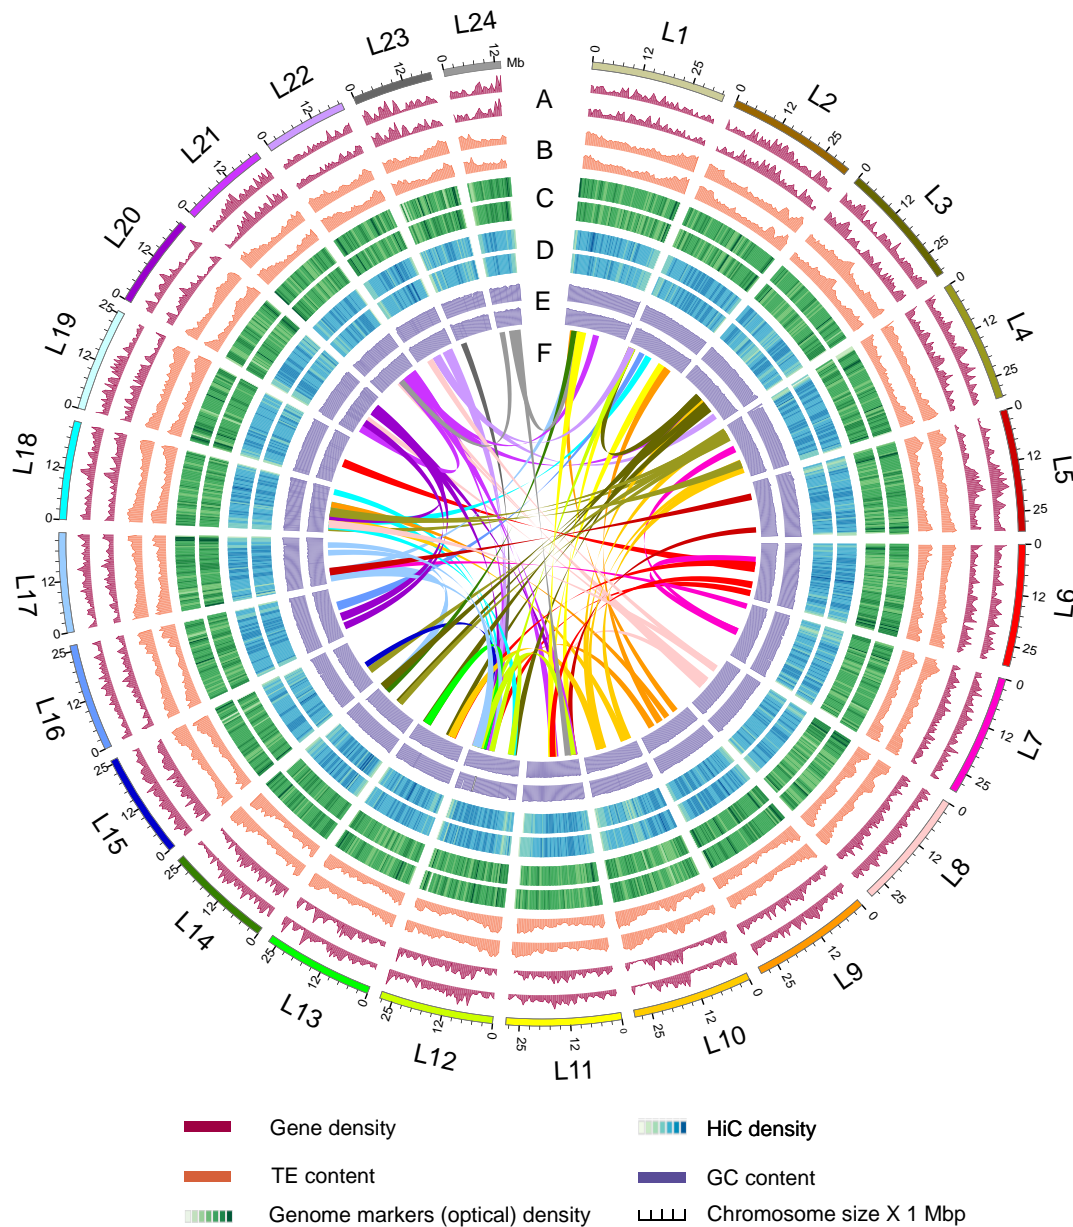

**Fig. 1. Overview of golden pompano genome (*Trachinotus ovatus*).** Numbers on the circumference are at the megabase scale. **A.** Gene density of female *T. ovatus* (window size = 500 Kb). **B.** TE content density of female *T. ovatus* (window size = 500 Kb). **C.** Genome markers (optical) density of female *T. ovatus* (window size = 500 Kb). **D.** Hi-C depth of female *T. ovatus* (window size = 500 Kb). **E** GC content of female *T. ovatus* (window size = 500 Kb). **F.** Color bands in the middle of the Circos plot connect segmental duplication (minimum five gene pairs) from Teleost-specific whole genome duplication (Ts3R) events.

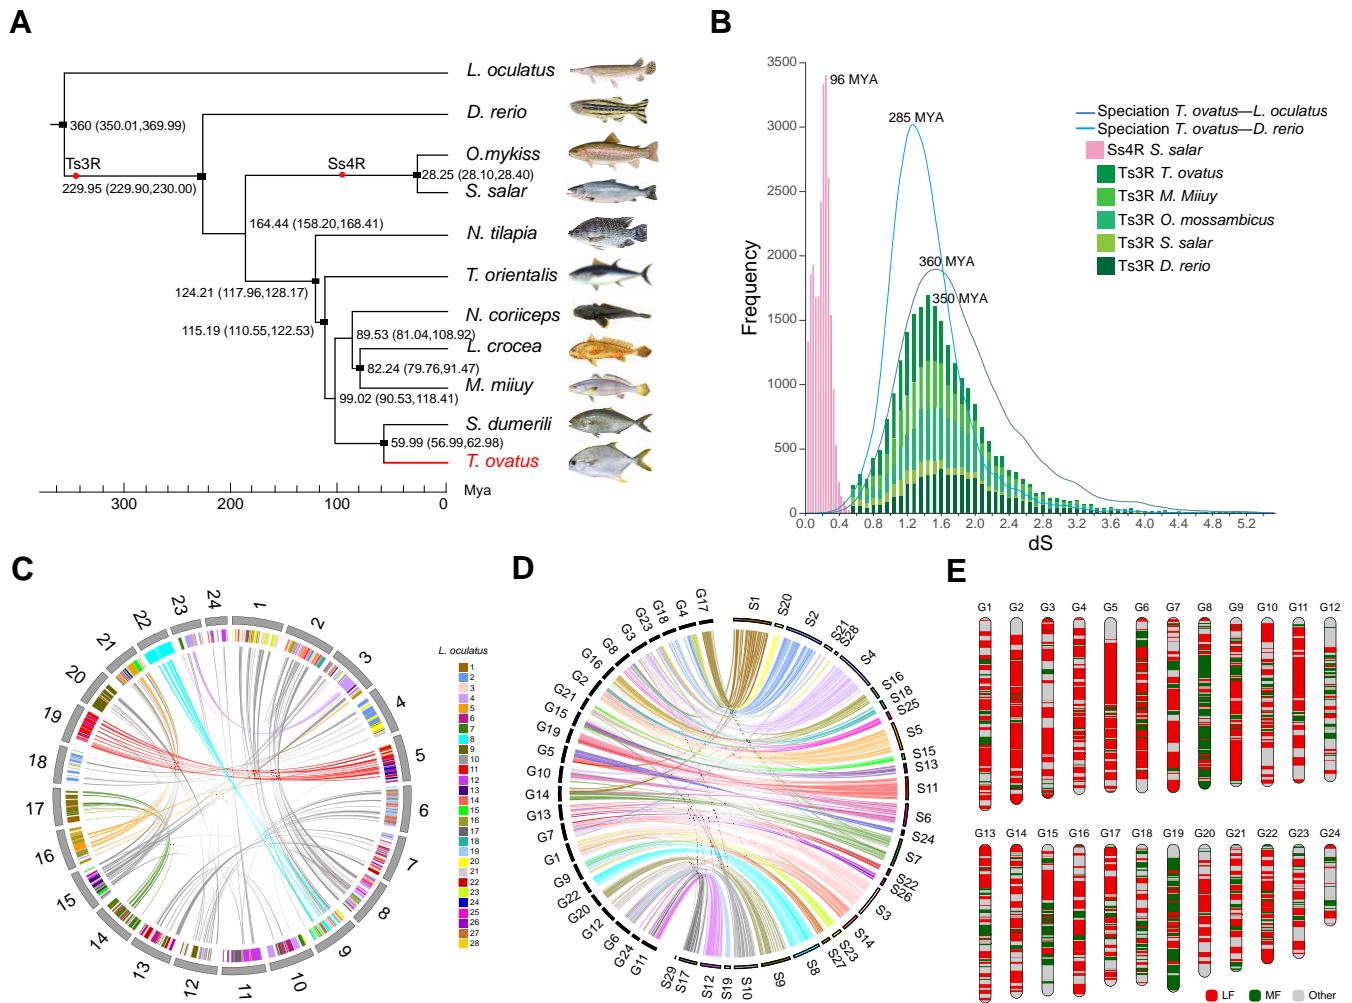

**Fig. 2 Genome evolution of golden pompano.** **A** Phylogenetic relationship of Perciformes and relevant teleost lineages. The position of golden pompano is highlighted in red. Red circles represent the Teleost specific whole genome duplication (Ts3R), Salmonid-specific whole genome duplication (Ss4R), respectively. The divergence time was estimated using the nodes with calibration times derived from the Time Tree database, which were marked by a black rectangle. All estimated divergence times are shown with 95% confidence intervals in brackets. **B** Inspection of whole genome duplication events based on synonymous mutation rate (Ks) distribution. The x axis shows the synonymous distance until a Ks cut-off of 5.2. Note that in order to represent all the data on the same frequency scale, bin sizes are different for each data set. **C** Internal genome synteny of golden pompano. Double-conserved synteny between the golden pompano and spot gar genomes. Each spot gar chromosome (represented as colored blocks) is mostly syntenic with two different chromosomes in the golden pompano genome (syntenic golden

1125 pompano regions represented by different colors according to spot gar chromosomal location), a pattern  
1126 typically associated with whole-genome duplication (Ts3R). Pairs of paralogous genes in spotted gar that  
1127 are inserted in a double-conserved synteny block are consistent with an origin at the Ts3R event  
1128 (ohnologues), while genes that are inserted in a double-conserved synteny block but have no paralogue  
1129 are singletons that have lost their duplicate copy since the Ts3R event. Only genes anchored to  
1130 chromosomes are represented. **D** Macro-synteny comparison between spotted gar and golden pompano  
1131 shows the overall one-to-two double-conserved synteny relationship between spotted gar to a post-Ts3R  
1132 teleost genome. **E** Component of less fragment (LF) and major fragment (MF) subgenomes within golden  
1133 pompano genome.

1134  
1135  
1136  
1137  
1138  
1139  
1140  
1141  
1142  
1143  
1144  
1145  
1146  
1147  
1148  
1149  
1150  
1151  
1152  
1153  
1154  
1155  
1156  
1157  
1158  
1159  
1160  
1161

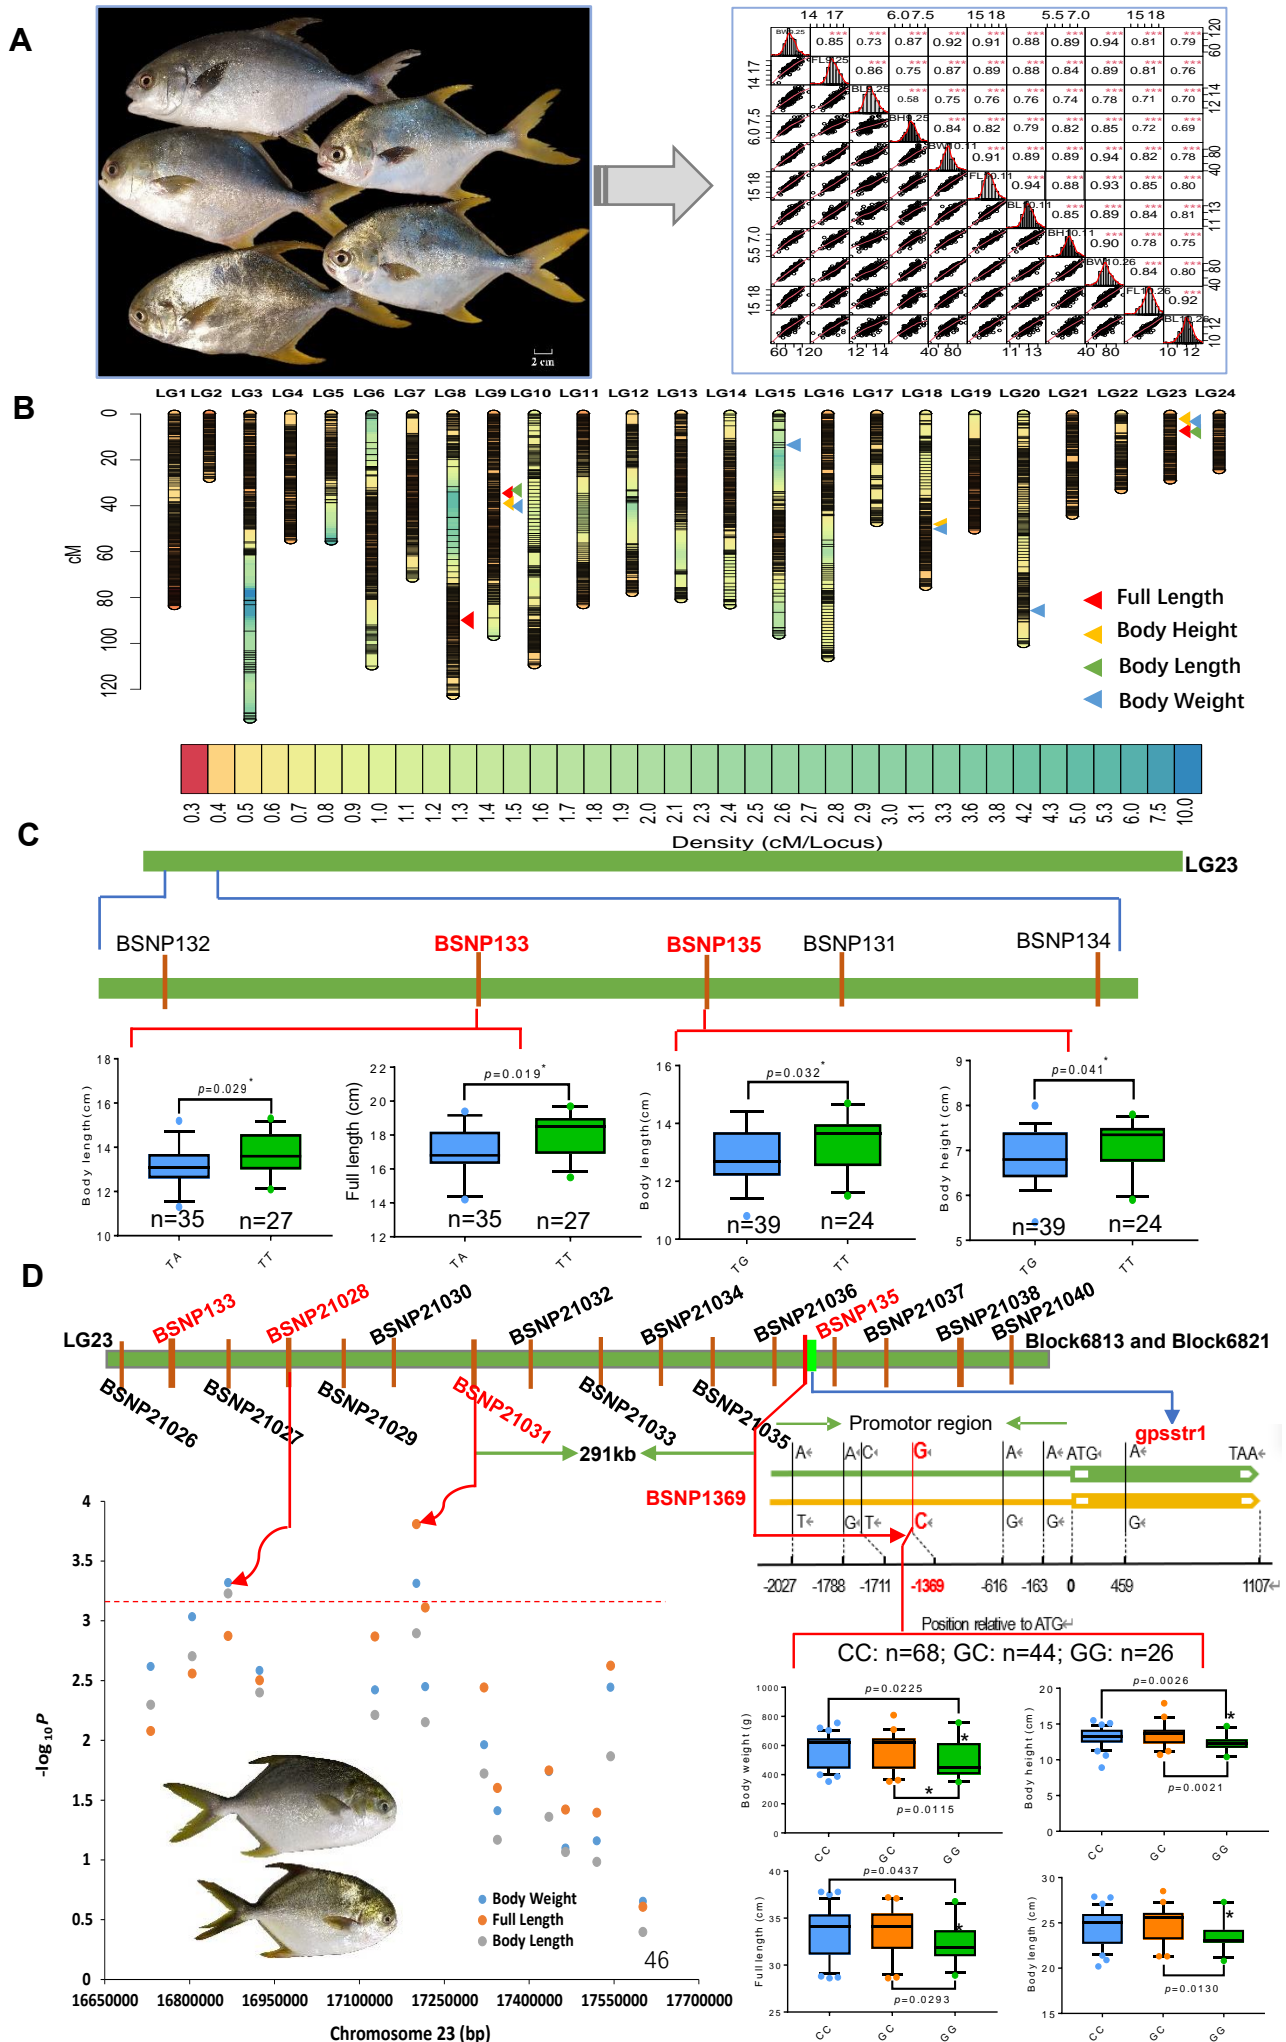

1208 **Fig. 3 The phenotypes and primary mapping and fine mapping of QTL for growth-related traits of**  
1209 **golden pompano. A.** The appearance of representative F<sub>1</sub> individuals. Scale bars, 2 cm (down right  
1210 corner). The variation and Pearson pairwise correlation analyses of body weight (BW), Full length (FL),  
1211 body length (BL) and body height (BH) of the F<sub>1</sub> population. The four traits were investigated for three  
1212 times on September 25<sup>th</sup>, October 11<sup>th</sup>, and October 26<sup>th</sup> of year 2017, respectively. The correlations were  
1213 calculated using Spearman correlation coefficients, and the *P* values are indicated as the following: \*, *p* <  
1214 0.05; \*\*, *p* < 0.01; \*\*\*, *p* < 0.001. The analysis was performed using the R package PerformanceAnalytics.  
1215 Frequency distribution histograms for the four traits are displayed along the diagonal (top right corner). **B.**  
1216 The high-density genetic map based on 4103 bin markers and repeatable QTLs responsible for BW, FL,  
1217 BL and BH. The graduated color indicates the marker density on the linkage groups. The triangle of  
1218 different colors represents different QTLs for corresponding traits. **C.** KASP-based (Kompetitive Allele-  
1219 Specific PCR) SNP confirmation for QTLs on linkage group (LG) 23. Five evenly distributed SNPs were  
1220 developed among the cluster QTL region on LG23 and 64 additional F<sub>1</sub> individuals were genotyped by  
1221 KASP Assays. The F<sub>1</sub> individuals were grouped according to their genotypes (TA&TT, TG&TT), and the  
1222 results were displayed by box charts. The significance testing was conducted by Wilcox Test. **D.** Fine  
1223 mapping of candidate gene *gpsr1l*. According to the confirmed SNPs (BSNP132, BSNP135), underlying  
1224 bin marker of Block6813 and Block6821, a total of 14 SNPs were developed to genotype a panel of 146  
1225 natural-collected individuals by KASP Assays. Manhattan plot of haplotype-based regional association  
1226 analysis was displayed. The red dotted line represents the significance threshold (*p*=0.01/14) (bottom left  
1227 corner). The SNP (-1369) in the promoter region of *gpsr1l* was verified by Sanger sequencing. The natural  
1228 growing group were grouped according to their genotypes (CC, GC&GG). Two-tailed Student's *t*-test was  
1229 used to calculate the *P* value between different groups (bottom right corner). For all the box charts:  
1230 minimum value = lower whisker, maximum value = upper whisker, median = middle value of box, lower

quartile = median of lower half of dataset, upper quartile = median of upper half of dataset, datapoint

outside of whiskers = potential outlier.

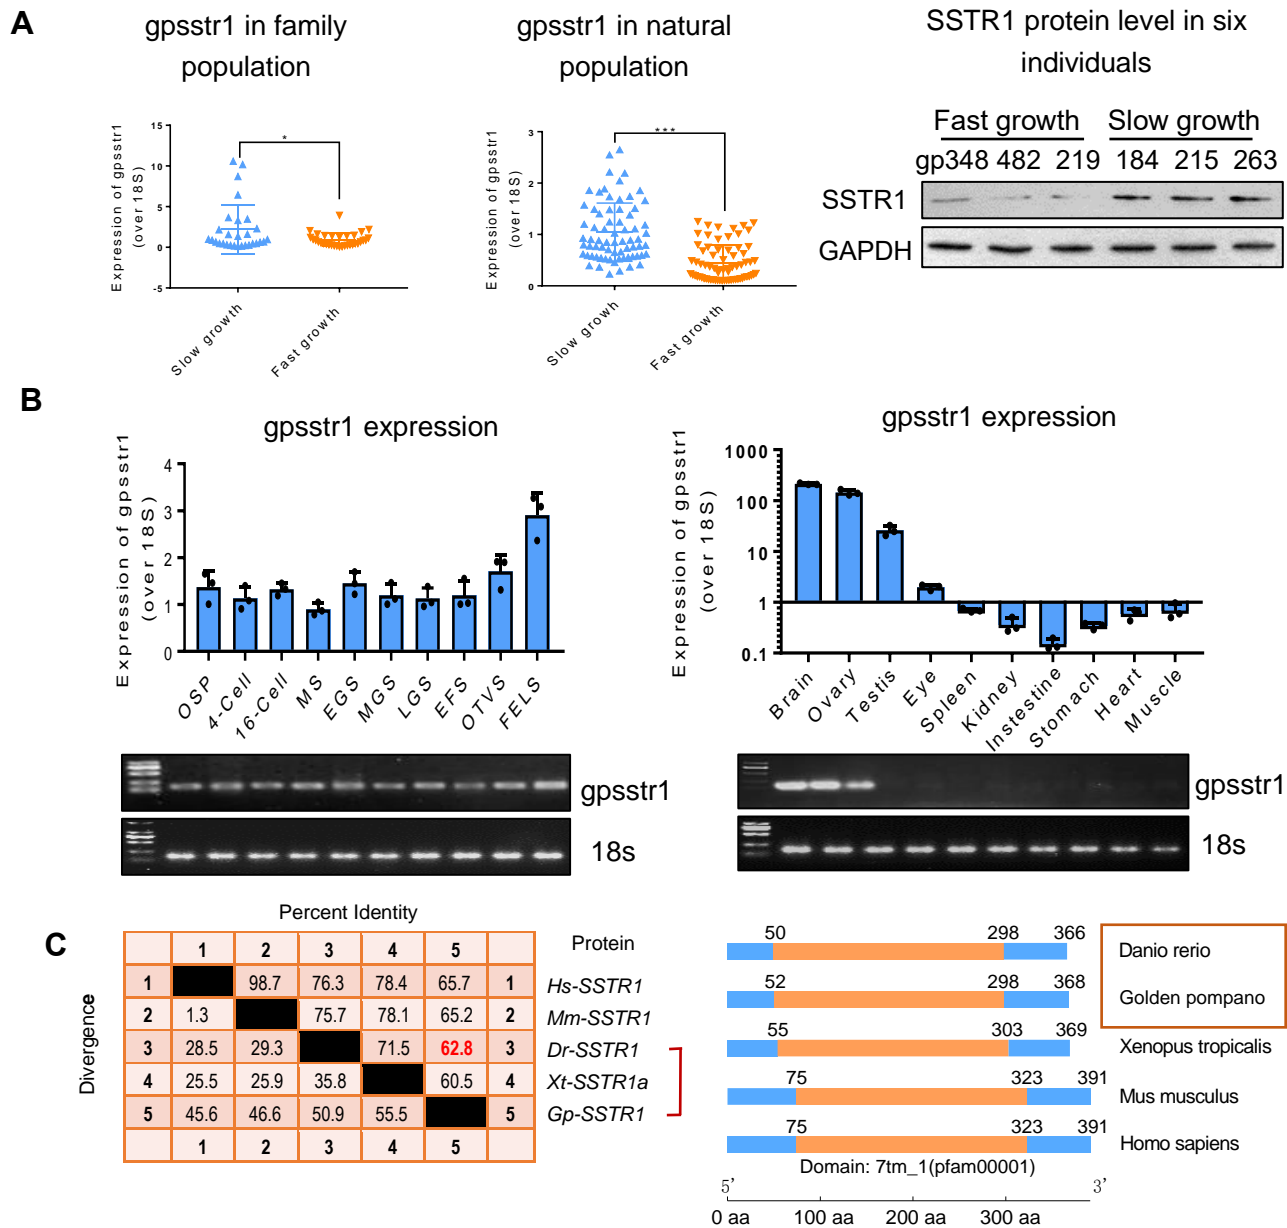

**Fig. 4** *Gpsstr1*, tightly associated with growth, is a conserved homologue of zebrafish *sstr1a*. **A.**

Expression of *gpsstr1* in 64 family population individuals (left) and 146 natural population individuals (middle) of golden pompano, respectively by using qPCR method. Golden pompano fishes were classified into slow and fast growth groups according to their growth trait data. The protein levels of SSTR1 in three fast growth (numbered as gp238, gp482 and gp219) and three slow growth individuals (numbered as



1270 gp184, gp215 and gp263) were measured by Western blotting method. Band intensity represents protein  
1271 level. The data represent as mean±sem. \* $p < 0.05$ , \*\* $p < 0.001$  represents statistically significant. **B.**  
1272 Expression profiles of *gpsstr1* in 10 embryo stages and 10 tissues of golden pompano by using qPCR (up)  
1273 and reverse transcription PCR (electrophoretic bands, down). 18S RNA was used as reference. OSP,  
1274 oosperm; MS, morula stage; EGS, early gastrula stage; MGS, middle gastrula stage; LGS, late gastrula  
1275 stage; EFS, embryo formed stage; OTVS, otocyst vesicle stage; FELS, formation of eye lens. **C.** *Gpsstr1*  
1276 is a homologue of zebrafish *sstr1a*. *SSTR1* protein sequences of *Homo sapien* (Hs), *Mus musculus* (Mm),  
1277 *Danio rerio* (Dr), *Xenopus tropicalis* (Xt) and *Golden pompano* (Gp) were aligned by using MegAlign  
1278 function of Lasergene software (version 6.0). 88.8% identity is found between Gp-SSTR1 and Dr-SSTR1.  
1279 A conserved domain 7tm\_1 was found in both Gp-SSTR1 and Dr-SSTR1 amino sequences.

1280

1281

1282

1283

1284

1285

1286

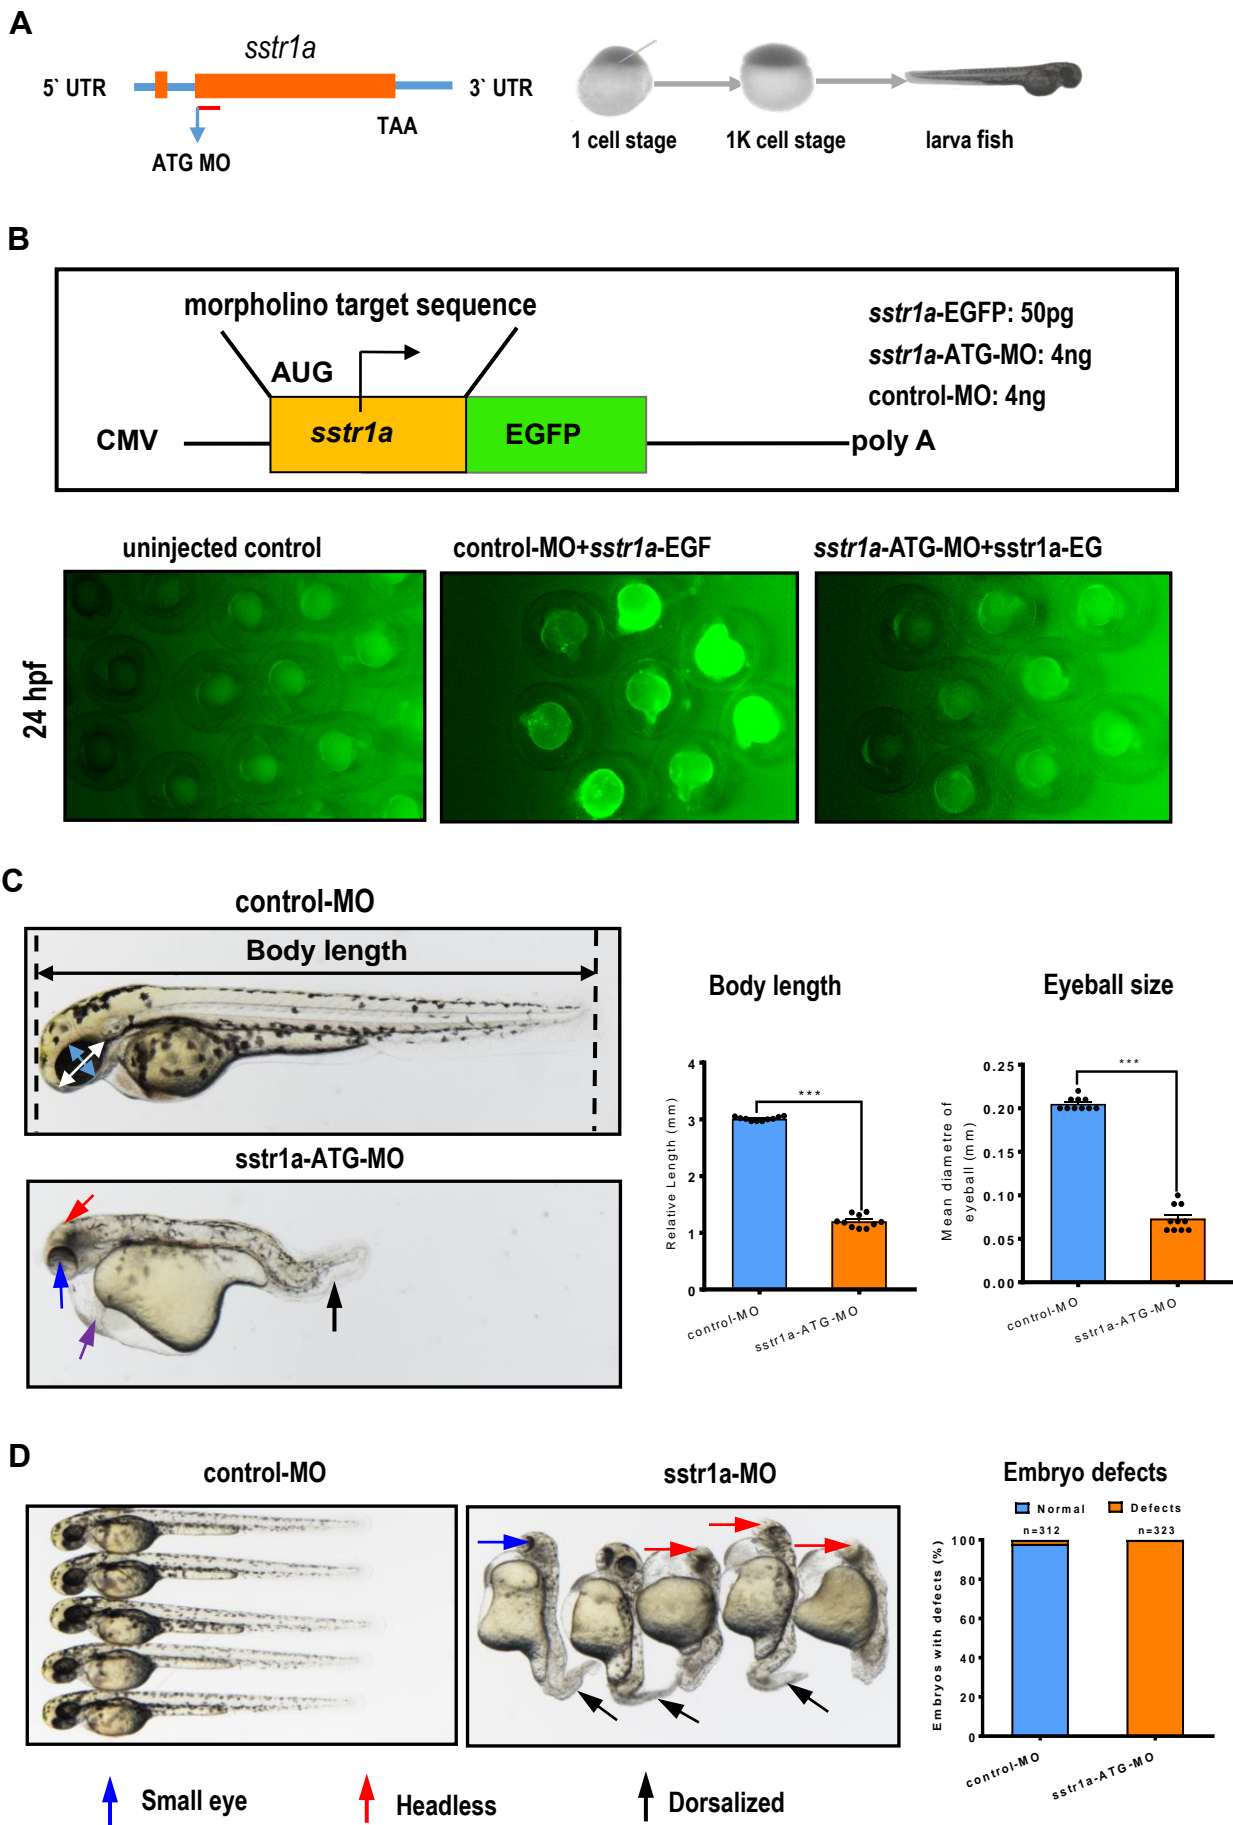

1287

1288

1289 **Fig. 5 Loss of *sstr1a* delays growth of zebrafish. A.** Schematic map of *sstr1a* gene and the MO design  
1290 and micro-injection strategy. **B.** Site-specific effect of *sstr1a*-MO injected into zebrafish. Box shows  
1291 schematic diagrams of *sstr1a*-EGFP fluorescent reporter mRNAs, the upper one containing the *sstr1a*-  
1292 ATG-MO target sequence (yellow box) fused in-frame with EGFP. 50pg *sstr1a*-EGFP injected with a  
1293 standard control morpholino (4ng) or *sstr1a*-ATG-MO (4ng). Embryos were photographed at 24-hpf.  
1294 Embryos injected with *sstr1a*-GFP plasmid DNA under the driving of CMV promoter showed green  
1295 fluorescence. When co-injected with *sstr1a*-ATG-MO, green fluorescence decreased dramatically. hpf,  
1296 hours post fertilization. **C.** Loss of *sstr1a* impacts the growth of zebrafish. Body length and eyeball size  
1297 were measured at 2-dpf. **D.** Gross morphology at 2-dpf. Compared with control MO, knock down *sstr1a*  
1298 present small eyes (blue arrow), tail patterning defects (dorsalized, black arrow), headless (red arrow) and  
1299 pericardial edema (purple arrow). The numbers of embryo defects were counted. Error bars, mean  $\pm$  s.e.m.;  
1300 **\*\*\*** $p < 0.0001$  (n =10; Student's t test). dpf, days post fertilization.

1301

1302

1303

1304

1305

1306

1307

1308

1309

1310

1311

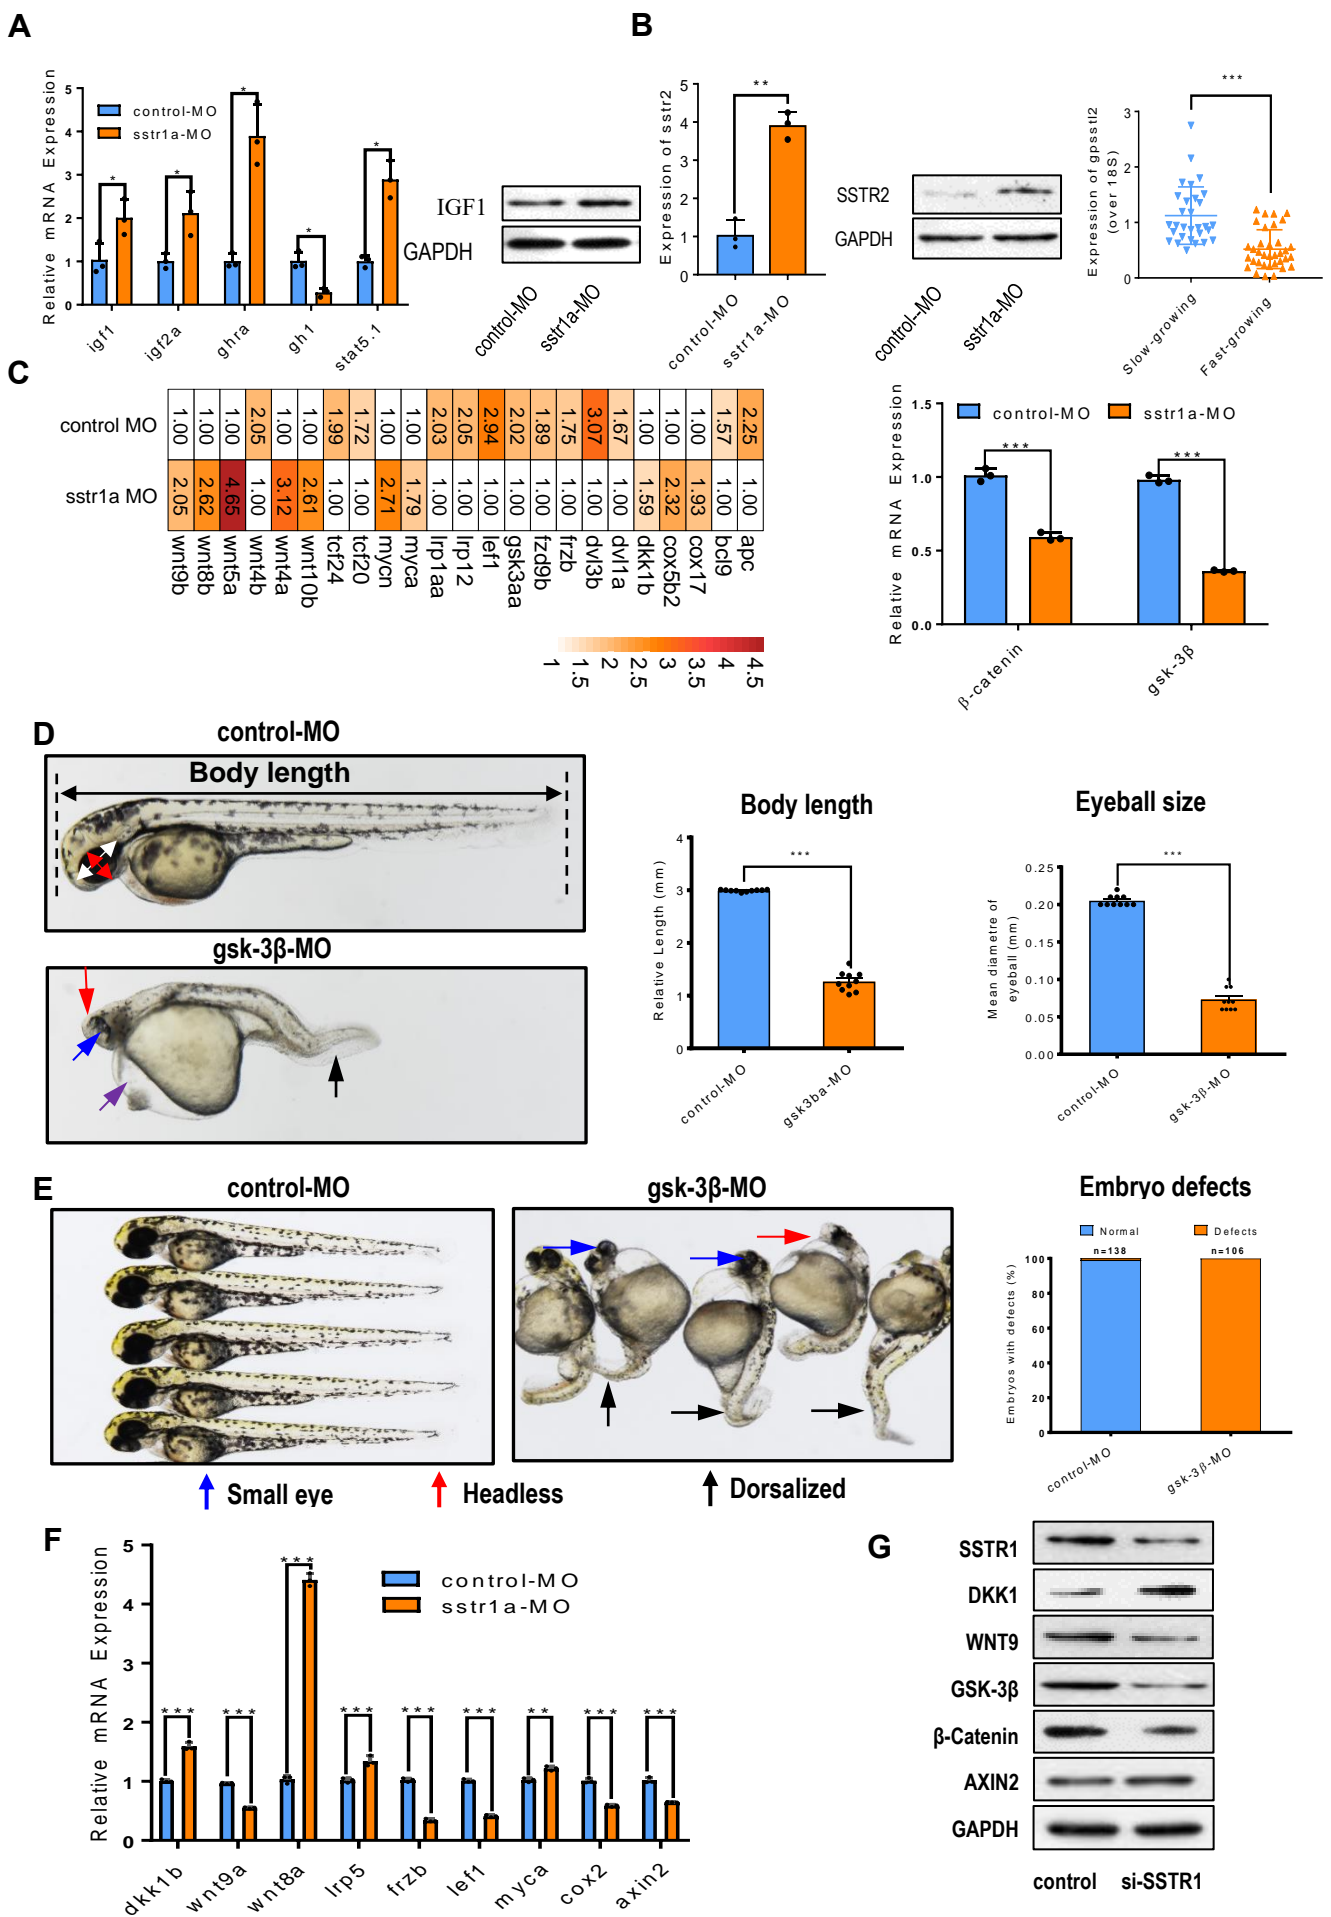

1335 **Fig. 6 Sstr1 controls growth via Wnt-gsk-3 $\beta$  signaling pathway. A.** Expressions of growth marker genes  
1336 in GH-IGF axis. Five genes, *igf1*, *igf2a*, *ghra*, *gh1* and *stat5.1*, were examined by qPCR upon *sstr1a*  
1337 depletion in zebrafish. Protein level of IGF1 was also measured by Western blotting with GAPDH as  
1338 internal reference. **B.** *Sstr2* may be responsible to the growth regulation upon *sstr1* depletion. mRNA and  
1339 protein levels of *sstr2* were detected by qPCR and Western blotting, respectively. mRNA of golden  
1340 pompano *sstr2* was also measured in 64 family population individuals by qPCR method. **C.** Genes  
1341 associated with Wnt signaling pathway were enriched upon *sstr1a* depletion in zebrafish. Heatmap shows  
1342 the differential expression of each gene in *sstr1a* knockdown and control group. The bar graph shows the  
1343 mRNA levels of two key genes,  $\beta$ -catenin and *gsk-3 $\beta$* , in Wnt signaling pathway. **D.** Growth defect  
1344 phenotype was induced by *gsk-3 $\beta$*  morphant depletion in zebrafish at 2-dpf. Compared with control MO,  
1345 knock down *gsk-3 $\beta$*  presents small eyes (blue arrow), and decreased both length. The bar graph shows the  
1346 quantification of the body lengths and eyeball diameters of embryos. These data are representative of three  
1347 independent experiments. Error bars, mean  $\pm$  s.e.m.; \*\*\*  $p < 0.0001$  (n =10; Student's t test). dpf, days  
1348 post fertilization. **E.** *Gsk-3 $\beta$*  morphant depletion induced phenotypes resemble those seen in mutant  
1349 embryos that lack Wnt signaling in zebrafish at 2-dpf and phenocopies the *sstr1a* depletion. Embryos  
1350 injected with *gsk-3 $\beta$*  morpholino (MO) displayed typical headless (red arrow) and more anterior  
1351 truncations (dorsalized, black arrow) than those injected with control MO. These phenotypes resemble the  
1352 *sstr1a* depletion. The bar graph shows the percentage of embryos with defects. These data are  
1353 representative of three independent experiments. **F.** Expressions of key genes involved in Wnt signaling.  
1354 Nine genes were measured upon *sstr1a* depletion at 2-dpf by using qPCR method. Compared with control  
1355 MO, knock down *gsk-3 $\beta$*  significantly downregulated eight genes except the *ddk1b* and *wnt8a*. These data  
1356 are representative of three independent experiments. **G.** Protein expression profiles of genes involved in  
1357 Wnt signaling. five key proteins were detected upon *sstr1* silence in 293T cells by western blotting.

GAPHD was used as internal reference. These data are representative of three independent experiments.

\* $p < 0.05$ , \*\* $p < 0.001$  represents statistically significant.

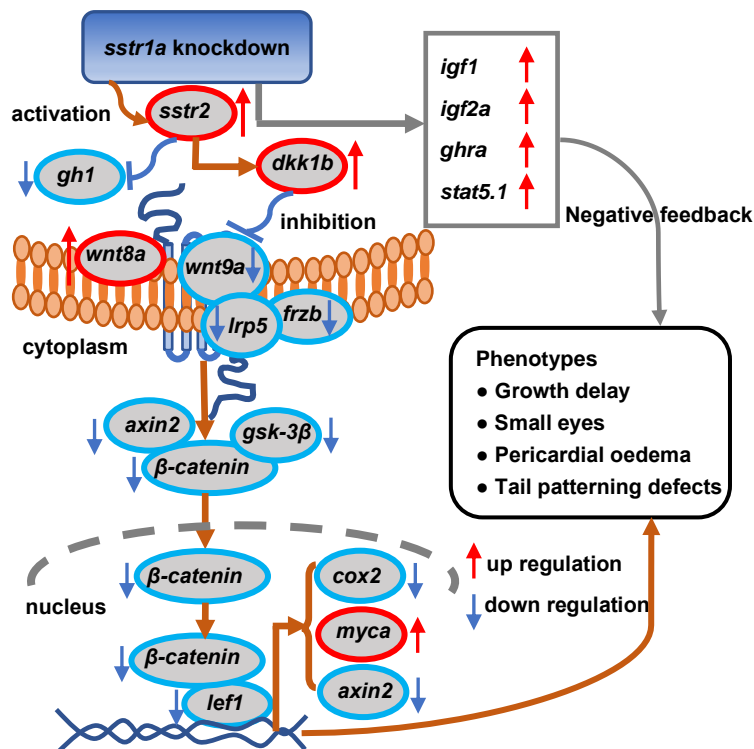

**Fig. 7 Schematic illustrating the possible mechanism that how *sstr1* mediates growth by bridging Wnt signaling and GH-IGF axis.** *Sstr1* depletion may on one hand activate *sstr2* and decrease *gh1* to inhibit growth, and on the other hand upregulate *igf1*, *igf2a*, *ghra* to negatively feedback suppress such over-inhibition. On the other hand, *sstr1* depletion downregulates 9 key genes playing essential roles in Wnt-*gsk-3β* signaling. The downregulation of Wnt-*gsk-3β* signaling explains the phenotypes of growth delay, small eyes, pericardial edema and tail patterning defects observed by *sstr1* depletion.
